# Supplementary material for: Nanoemulsion adjuvantation strategy of tumor-associated antigen therapy rephrases mucosal and immunotherapeutic signatures following intranasal vaccination
Source: PubMed Central journal article supplement — J Immunother Cancer. 2020 Oct 9;8(2):e001022. doi: 10.1136/jitc-2020-001022 (PMC7549439; doi:10.1136/jitc-2020-001022), 2020-10-09
Supplement: jitc-2020-001022supp001.pdf [file jitc-2020-001022supp001.pdf]

Supplementary Material  
for  
**Nanoemulsion adjuvantation strategy of tumor associated antigen  
therapy rephrases mucosal and immunotherapeutic signatures  
following intranasal vaccination**

Chung-Hsiung Huang, Chiung-Yi Huang, Hui-Min Ho, Ching-Hung Lee, Pang-Ti Lai,  
Suh-Chin Wu, Shih-Jen Liu, Ming-Hsi Huang

Correspondence to Dr Ming-Hsi Huang; [huangminghsi@nhri.org.tw](mailto:huangminghsi@nhri.org.tw)

- Figure S1.** Nanoemulsion elaboration.
- Figure S2.** Activation of murine bone marrow-derived dendritic cells in vitro.
- Figure S3.** IHC staining of T-cell subsets in nasal mucosal tissues.
- Table S1.** Complete list of microarray selected hits having a p-value  $\leq 0.05$  and a fold change  $\geq |1.5|$ , PELC@PE vs PBS.
- Table S2.** Complete list of microarray selected hits having a p-value  $\leq 0.05$  and a fold change  $\geq |1.5|$ , PELC@MN vs PBS.
- Table S3.** Complete list of microarray selected hits having a p-value  $\leq 0.05$  and a fold change  $\geq |1.5|$ , PELC@MN vs PELC@PE.
- Table S4.** Core response gene list.

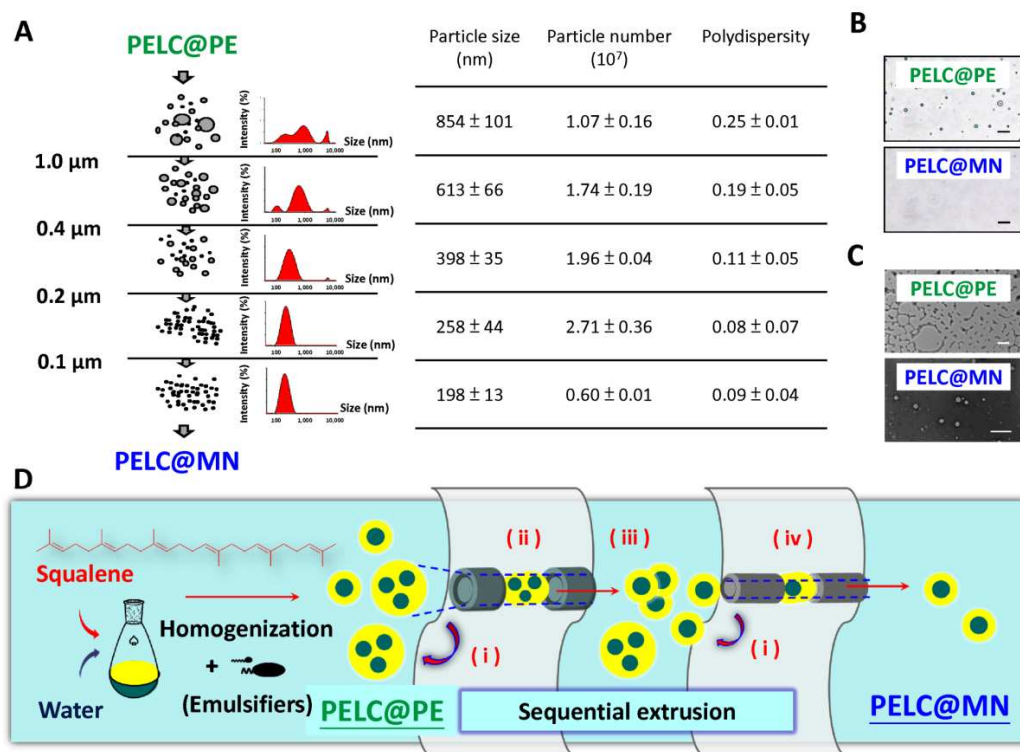

**Supplementary Figure S1.** Nanoemulsion elaboration. (A) DLS-measured particle size distribution of the emulsified particles following homogenization and sequential extrusion. Data are expressed as the means  $\pm$  standard deviation of three samples. (B) OM and (C) TEM images of PELC@PE and PELC@MN. Scale bars, 1  $\mu$ m. (D) Schematic illustration of the proposed structure of the emulsified particles issued from homogenization and sequential extrusion (i) refraction; (ii) transformation; (iii) fracture; (iv) deformation. The particle size will still tend toward polydisperse distribution after the initial pass through a 1.0- $\mu$ m membrane. The diameters of the emulsified particles are lower than the pore size of the membrane filters through 1.0  $\mu$ m and 0.4  $\mu$ m, probably due to the mechanisms comprising transformation and fracture which predominate the aspects of the particles; on the other hand, when the samples were extruded through filters with 0.2- $\mu$ m and 0.1- $\mu$ m membrane pores, the measured diameters were slightly higher than the pore size of the filter through which they were extruded. This feature may be attributed to the deformation nature of the particles. The recorded optical microscope (OM) images displayed PELC@PE was of spherical shape. Frustratingly, PELC@MN was invisible under OM mainly due to the light diffraction limit. The transmission electron microscopy (TEM) results showed that PELC@MN maintains spherical shape; it failed to capture the TEM images for PELC@PE because submicron squalene/water samples possess a rather low colloidal stability and will be fractured during fixation and dehydration.

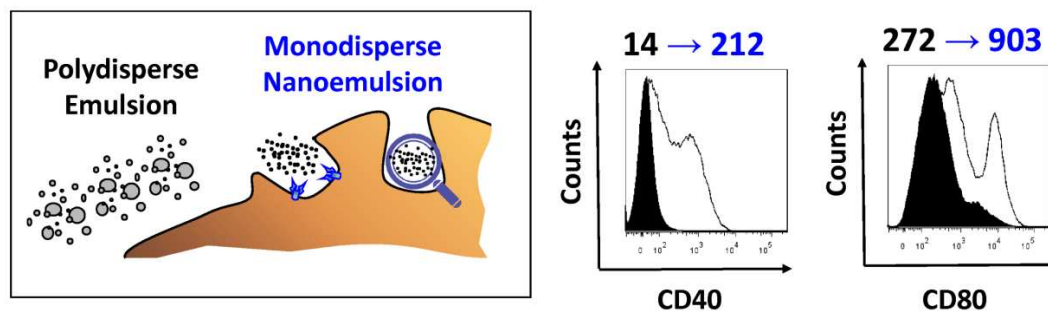

**Supplementary Figure S2.** Activation of murine bone marrow-derived dendritic cells in vitro. Bone marrow-derived dendritic cells (BMDCs) were harvested from BALB/c mice, seeded at a density of  $1 \times 10^6$  cells, and co-incubated with emulsified particles original polydisperse (PELC@PE, black area) or tailored monodisperse nanoemulsion (PELC@MN, white area) for 18 h. The expression levels of the costimulatory molecules CD40 and CD80 were determined by flow cytometry. All data were gated on CD11c<sup>+</sup> cells. The change in mean fluorescence intensity (MFI) from PELC@PE to PELC@MN is indicated. The data are representative of three independent experiments. The results demonstrated that emulsified particles with monodisperse nanosized distribution could dramatically induce activation of BMDCs in vitro, compared with polydisperse ones.

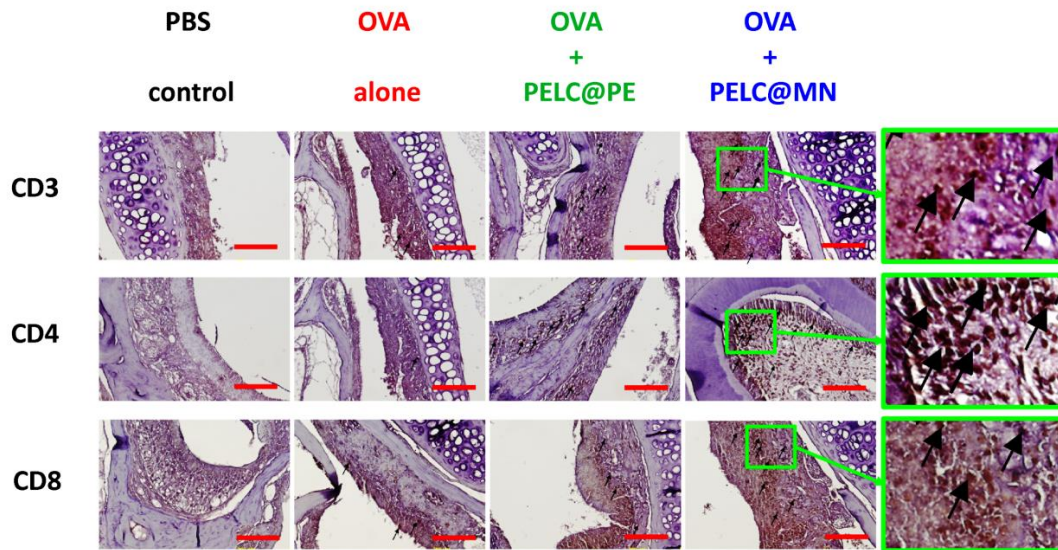

**Supplementary Figure S3.** IHC staining of T-cell subsets in nasal mucosal tissues following intranasal vaccination with protein antigen adjuvanted with different formulations. The mice were intranasally vaccinated with OVA (100  $\mu$ g per dose) alone or adjuvanted with either PELC@PE or PELC@MN, once a week for 3 weeks. One week after the final vaccination, the nasal mucosal tissues (three mice per group) were prepared for IHC staining of T-cell subsets. The brown signals (arrows) indicate IHC-positive cells (magnification, 400x). Scale bars, 100  $\mu$ m. The results are representative of three independent experiments.

**Supplementary Table S1.** Complete list of microarray selected hits having a p-value  $\leq 0.05$  and a fold change  $\geq |1.5|$ . Data are expressed as the average fold change of three repeats in each treatment group (PELC@PE vs PBS)

| Transcript ID | Gene Symbol   | Gene Name                                                                                                     | PELC@PE vs PBS |             |
|---------------|---------------|---------------------------------------------------------------------------------------------------------------|----------------|-------------|
|               |               |                                                                                                               | p-value        | Fold-Change |
| 17511643      | Ces1a         | carboxylesterase 1A [ Mus musculus (house mouse) ]                                                            | 0.005          | 3.940       |
| 17482290      | Acsm4         | acyl-CoA synthetase medium-chain family member 4 [ Mus musculus (house mouse) ]                               | 0.032          | 2.665       |
| 17481252      | Olf635        | olfactory receptor 635 [ Mus musculus (house mouse) ]                                                         | 0.025          | 2.536       |
| 17229050      | Fmo6          | flavin containing monooxygenase 6 [ Mus musculus (house mouse) ]                                              | 0.040          | 2.506       |
| 17361878      | Slc22a20      | Mus musculus solute carrier family 22 (organic anion transporter), member 20 (Slc22a20), mRNA                 | 0.049          | 2.498       |
| 17378035      | Bpifb6        | BPI fold containing family B, member 6 [ Mus musculus (house mouse) ]                                         | 0.029          | 2.402       |
| 17359918      | Elovl3        | elongation of very long chain fatty acids (FEN1/Elo2, SUR4/Elo3, yeast)-like 3 [ Mus musculus (house mouse) ] | 0.024          | 2.350       |
| 17483975      | 5430419D17Rik | RIKEN cDNA 5430419D17 gene                                                                                    | 0.038          | 2.294       |
| 17529227      | unknown       | Unknown                                                                                                       | 0.046          | 2.261       |
| 17536538      | Awat1         | acyl-CoA wax alcohol acyltransferase 1 [ Mus musculus (house mouse) ]                                         | 0.038          | 2.215       |
| 17333292      | Slc22a2       | solute carrier family 22 (organic cation transporter), member 2 [ Mus musculus (house mouse) ]                | 0.042          | 2.180       |
| 17378072      | Bpifb4        | BPI fold containing family B, member 4 [ Mus musculus (house mouse) ]                                         | 0.030          | 2.180       |
| 17387638      | Olf1042       | olfactory receptor 1042 [ Mus musculus (house mouse) ]                                                        | 0.023          | 2.137       |
| 17513135      | Ldhd          | lactate dehydrogenase D [ Mus musculus (house mouse) ]                                                        | 0.029          | 2.137       |
| 17494154      | Olf578        | olfactory receptor 578 [ Mus musculus (house mouse) ]                                                         | 0.043          | 2.078       |
| 17423019      | Sdr16c6       | short chain dehydrogenase/reductase family 16C, member 6 [ Mus musculus (house mouse) ]                       | 0.031          | 2.061       |
| 17326933      | Krtap6-3      | keratin associated protein 6-3 [ Mus musculus (house mouse) ]                                                 | 0.012          | 2.057       |
| 17376191      | Tgm3          | transglutaminase 3, E polypeptide [ Mus musculus (house mouse) ]                                              | 0.005          | 2.049       |
| 17296080      | unknown       | Unknown                                                                                                       | 0.013          | 2.046       |

| Transcript ID | Gene Symbol | Gene Name                                                                                                        | PELC@PE vs PBS |             |
|---------------|-------------|------------------------------------------------------------------------------------------------------------------|----------------|-------------|
|               |             |                                                                                                                  | p-value        | Fold-Change |
| 17503926      | Mt4         | metallothionein 4 [ Mus musculus (house mouse) ]                                                                 | 0.008          | 2.006       |
| 17387758      | Olf1128     | olfactory receptor 1128 [ Mus musculus (house mouse) ]                                                           | 0.032          | 1.999       |
| 17429290      | Olf1328     | olfactory receptor 1328 [ Mus musculus (house mouse) ]                                                           | 0.032          | 1.983       |
| 17387612      | Olf1002     | olfactory receptor 1002 [ Mus musculus (house mouse) ]                                                           | 0.033          | 1.981       |
| 17416685      | unknown     | Unknown                                                                                                          | 0.009          | 1.979       |
| 17517360      | Sln         | sarcolipin [ (house mouse)]                                                                                      | 0.031          | 1.965       |
| 17448997      | Nmu         | neuromedin U [ Mus musculus (house mouse) ]                                                                      | 0.016          | 1.952       |
| 17494422      | Olf655      | olfactory receptor 655 [ Mus musculus (house mouse) ]                                                            | 0.002          | 1.947       |
| 17481359      | Olf689      | olfactory receptor 689 [ Mus musculus (house mouse) ]                                                            | 0.040          | 1.943       |
| 17352957      | Dsc1        | desmocollin 1 [ (house mouse)]                                                                                   | 0.027          | 1.938       |
| 17467519      | Igkv8-30    | immunoglobulin kappa chain variable 8-30 [ Mus musculus ]                                                        | 0.023          | 1.933       |
| 17499613      | Defb3       | defensin beta 3 [ (house mouse)]                                                                                 | 0.041          | 1.910       |
| 17417924      | unknown     | Unknown                                                                                                          | 0.002          | 1.890       |
| 17537906      | Kir3dl1     | killer cell immunoglobulin-like receptor, three domains, long cytoplasmic tail, 1 [ Mus musculus (house mouse) ] | 0.022          | 1.884       |
| 17343856      | Btnl5       | butyrophilin-like 5 [ Mus musculus (house mouse) ]                                                               | 0.022          | 1.862       |
| 17525141      | Gm1110      | predicted gene 1110                                                                                              | 0.000          | 1.847       |
| 17246435      | Olf810      | olfactory receptor 810 [ Mus musculus (house mouse) ]                                                            | 0.023          | 1.819       |
| 17322026      | Krt2        | keratin 2 [ (house mouse)]                                                                                       | 0.037          | 1.819       |
| 17225253      | Kcnj13      | potassium inwardly-rectifying channel, subfamily J, member 13 [ Mus musculus (house mouse) ]                     | 0.022          | 1.812       |
| 17494457      | Olf675      | olfactory receptor 675 [ Mus musculus (house mouse) ]                                                            | 0.037          | 1.812       |
| 17429586      | unknown     | Unknown                                                                                                          | 0.038          | 1.801       |
| 17494170      | Olf603      | olfactory receptor 603 [ Mus musculus (house mouse) ]                                                            | 0.041          | 1.797       |

| Transcript ID | Gene Symbol   | Gene Name                                                                                   | PELC@PE vs PBS |             |
|---------------|---------------|---------------------------------------------------------------------------------------------|----------------|-------------|
|               |               |                                                                                             | p-value        | Fold-Change |
| 17211347      | Tfap2b        | transcription factor AP-2 beta [ Mus musculus (house mouse) ]                               | 0.029          | 1.795       |
| 17326887      | ORF63         | Map3k7 C-terminal like [ Mus musculus (house mouse) ]                                       | 0.027          | 1.786       |
| 17329207      | 2310042E22Rik | transmembrane epididymal family member 3 [ Mus musculus (house mouse) ]                     | 0.008          | 1.778       |
| 17337618      | Olf128        | olfactory receptor 128 [ Mus musculus (house mouse) ]                                       | 0.006          | 1.773       |
| 17358825      | I830012O16Rik | interferon-induced protein with tetratricopeptide repeats 3B [ Mus musculus (house mouse) ] | 0.034          | 1.763       |
| 17337580      | Olf111        | olfactory receptor 111 [ Mus musculus (house mouse) ]                                       | 0.003          | 1.758       |
| 17507665      | AF366264      | cDNA sequence AF366264 [ (house mouse)]                                                     | 0.043          | 1.758       |
| 17516145      | Olf1894       | olfactory receptor 894 [ Mus musculus (house mouse) ]                                       | 0.027          | 1.756       |
| 17494267      | Olf1640       | olfactory receptor 640 [ Mus musculus (house mouse) ]                                       | 0.031          | 1.751       |
| 17494115      | Olf1553       | olfactory receptor 553 [ Mus musculus (house mouse) ]                                       | 0.004          | 1.747       |
| 17421168      | unknown       | Unknown                                                                                     | 0.009          | 1.730       |
| 17421327      | unknown       | Unknown                                                                                     | 0.022          | 1.727       |
| 17494144      | Olf1569       | olfactory receptor 569 [ Mus musculus (house mouse) ]                                       | 0.008          | 1.718       |
| 17494214      | Olf168        | olfactory receptor 68 [ Mus musculus (house mouse) ]                                        | 0.049          | 1.716       |
| 17212301      | Tmem182       | transmembrane protein 182 [ (house mouse)]                                                  | 0.016          | 1.706       |
| 17539494      | Ace2          | angiotensin I converting enzyme (peptidyl-dipeptidase A) 2 [ Mus musculus (house mouse) ]   | 0.002          | 1.697       |
| 17285631      | Gpx6          | glutathione peroxidase 6 [ Mus musculus (house mouse) ]                                     | 0.010          | 1.697       |
| 17265524      | unknown       | Unknown                                                                                     | 0.048          | 1.696       |
| 17411101      | unknown       | Unknown                                                                                     | 0.008          | 1.692       |
| 17516120      | Olf145        | olfactory receptor 145 [ Mus musculus (house mouse) ]                                       | 0.002          | 1.689       |
| 17481182      | Olf1594       | olfactory receptor 594 [ Mus musculus (house mouse) ]                                       | 0.002          | 1.681       |

| Transcript ID | Gene Symbol   | Gene Name                                                                                                     | PELC@PE vs PBS |             |
|---------------|---------------|---------------------------------------------------------------------------------------------------------------|----------------|-------------|
|               |               |                                                                                                               | p-value        | Fold-Change |
| 17317428      | Gsdmc         | gasdermin C [ (house mouse)]                                                                                  | 0.018          | 1.680       |
| 17379992      | Sall4         | sal-like 4 (Drosophila) [ (house mouse)]                                                                      | 0.046          | 1.676       |
| 17385028      | unknown       | Unknown                                                                                                       | 0.005          | 1.676       |
| 17529307      | Elovl4        | elongation of very long chain fatty acids (FEN1/Elo2, SUR4/Elo3, yeast)-like 4 [ Mus musculus (house mouse) ] | 0.035          | 1.676       |
| 17318008      | 2300005B03Rik | secreted Ly6/Plaur domain containing 2 [ Mus musculus (house mouse) ]                                         | 0.038          | 1.673       |
| 17382592      | Ptgds         | prostaglandin D2 synthase (brain) [ (house mouse)]                                                            | 0.022          | 1.673       |
| 17544277      | unknown       | Unknown                                                                                                       | 0.003          | 1.672       |
| 17367644      | Il1f8         | interleukin 1 family, member 8 [ (house mouse)]                                                               | 0.035          | 1.671       |
| 17528214      | unknown       | Unknown                                                                                                       | 0.028          | 1.668       |
| 17226164      | unknown       | Unknown                                                                                                       | 0.011          | 1.668       |
| 17366922      | Mir669m-1     | microRNA 669m-1 [ Mus musculus (house mouse) ]                                                                | 0.028          | 1.667       |
| 17494394      | Trim30a       | tripartite motif-containing 30A [ (house mouse)]                                                              | 0.002          | 1.662       |
| 17540378      | Maob          | monoamine oxidase B [ (house mouse)]                                                                          | 0.049          | 1.654       |
| 17357416      | unknown       | Unknown                                                                                                       | 0.037          | 1.653       |
| 17449445      | unknown       | Unknown                                                                                                       | 0.012          | 1.653       |
| 17237975      | unknown       | Unknown                                                                                                       | 0.018          | 1.652       |
| 17407431      | Lce1a1        | late cornified envelope 1A1 [ Mus musculus (house mouse) ]                                                    | 0.011          | 1.651       |
| 17499576      | Defb34        | defensin beta 34 [ Mus musculus (house mouse) ]                                                               | 0.024          | 1.643       |
| 17404337      | Cpa3          | carboxypeptidase A3, mast cell [ Mus musculus (house mouse) ]                                                 | 0.040          | 1.640       |
| 17525712      | Olf937        | olfactory receptor 937 [ Mus musculus (house mouse) ]                                                         | 0.011          | 1.628       |
| 17274021      | Osr1          | odd-skipped related 1 (Drosophila) [ Mus musculus (house mouse) ]                                             | 0.002          | 1.621       |
| 17481155      | Olf937        | olfactory receptor 568 [ Mus musculus (house mouse) ]                                                         | 0.031          | 1.621       |
| 17487054      | Psg26         | pregnancy-specific glycoprotein 26 [ Mus musculus (house mouse) ]                                             | 0.002          | 1.621       |
| 17366884      | unknown       | Unknown                                                                                                       | 0.030          | 1.620       |



| Transcript ID | Gene Symbol   | Gene Name                                                                          | PELC@PE vs PBS |             |
|---------------|---------------|------------------------------------------------------------------------------------|----------------|-------------|
|               |               |                                                                                    | p-value        | Fold-Change |
| 17477266      | Klk5          | kallikrein related-peptidase 5 [ (house mouse)]                                    | 0.026          | 1.616       |
| 17516143      | Olf893        | olfactory receptor 893 [ Mus musculus (house mouse) ]                              | 0.017          | 1.614       |
| 17367666      | Il1f5         | interleukin 1 family, member 5 (delta) [ (house mouse)]                            | 0.028          | 1.614       |
| 17284654      | unknown       | Unknown                                                                            | 0.037          | 1.598       |
| 17399981      | Rptn          | repetin [ (house mouse)]                                                           | 0.034          | 1.592       |
| 17265818      | Olf410        | olfactory receptor 410 [ Mus musculus (house mouse) ]                              | 0.041          | 1.592       |
| 17387810      | Olf1166       | olfactory receptor 1166 [ Mus musculus (house mouse) ]                             | 0.037          | 1.592       |
| 17379887      | unknown       | Unknown                                                                            | 0.020          | 1.588       |
| 17407439      | Lce1a2        | late cornified envelope 1A2 [ Mus musculus (house mouse) ]                         | 0.038          | 1.587       |
| 17372888      | Olf1151       | olfactory receptor 1151 [ Mus musculus (house mouse) ]                             | 0.027          | 1.586       |
| 17333812      | Vmn2r101      | vomer nasal 2, receptor 101 [ Mus musculus (house mouse) ]                         | 0.017          | 1.582       |
| 17367659      | Il1f6         | interleukin 1 family, member 6 [ (house mouse)]                                    | 0.039          | 1.582       |
| 17277760      | 5430427M07Rik | RIKEN cDNA 5430427M07 gene [ Mus musculus (house mouse) ]                          | 0.008          | 1.569       |
| 17304901      | 3425401B19Rik | RIKEN cDNA 3425401B19 gene [ Mus musculus (house mouse) ]                          | 0.043          | 1.558       |
| 17257327      | unknown       | Unknown                                                                            | 0.016          | 1.554       |
| 17521068      | unknown       | Unknown                                                                            | 0.006          | 1.548       |
| 17265526      | Nlrp1c        | NLR family, pyrin domain containing 1C                                             | 0.004          | 1.546       |
| 17271143      | Cacng1        | calcium channel, voltage-dependent, gamma subunit 1 [ Mus musculus (house mouse) ] | 0.035          | 1.543       |
| 17355076      | unknown       | Unknown                                                                            | 0.022          | 1.539       |
| 17322099      | Krt78         | keratin 78 [ (house mouse)]                                                        | 0.009          | 1.535       |
| 17370345      | Olf348        | olfactory receptor 348 [ Mus musculus (house mouse) ]                              | 0.044          | 1.527       |
| 17257651      | unknown       | Unknown                                                                            | 0.037          | 1.519       |
| 17517105      | Il18          | interleukin 18 [ (house mouse)]                                                    | 0.010          | 1.515       |

| Transcript ID | Gene Symbol  | Gene Name                                                                                                        | PELC@PE vs PBS |             |
|---------------|--------------|------------------------------------------------------------------------------------------------------------------|----------------|-------------|
|               |              |                                                                                                                  | p-value        | Fold-Change |
| 17264946      | Chrn1        | cholinergic receptor, nicotinic, beta polypeptide 1 (muscle) [ Mus musculus (house mouse) ]                      | 0.048          | 1.514       |
| 17512868      | Chst4        | carbohydrate (chondroitin 6/keratan) sulfotransferase 4 [ Mus musculus (house mouse) ]                           | 0.021          | 1.513       |
| 17499723      | LOC100505096 | alpha-defensin 20-like mRNA [ Mus musculus ]                                                                     | 0.039          | 1.511       |
| 17482230      | Acsm5        | acyl-CoA synthetase medium-chain family member 5 [ Mus musculus (house mouse) ]                                  | 0.003          | 1.510       |
| 17349304      | Tslp         | thymic stromal lymphopoietin [ (house mouse)]                                                                    | 0.029          | 1.510       |
| 17482310      | Acsm3        | acyl-CoA synthetase medium-chain family member 3 [ Mus musculus (house mouse) ]                                  | 0.039          | 1.508       |
| 17337614      | Olf127       | olfactory receptor 127 [ Mus musculus (house mouse) ]                                                            | 0.002          | 1.506       |
| 17285240      | unknown      | Unknown                                                                                                          | 0.003          | 1.503       |
| 17291222      | Hist2h3b     | histone cluster 2, H3b [ (house mouse)]                                                                          | 0.014          | 1.502       |
| 17372351      | Neurod1      | neurogenic differentiation 1 [ (house mouse)]                                                                    | 0.009          | -1.501      |
| 17377523      | unknown      | Unknown                                                                                                          | 0.010          | -1.503      |
| 17411172      | unknown      | Unknown                                                                                                          | 0.026          | -1.503      |
| 17303494      | unknown      | Unknown                                                                                                          | 0.028          | -1.507      |
| 17404652      | unknown      | Unknown                                                                                                          | 0.000          | -1.509      |
| 17444481      | Bhlha15      | basic helix-loop-helix family, member a15 [ Mus musculus (house mouse) ]                                         | 0.042          | -1.509      |
| 17396339      | unknown      | Unknown                                                                                                          | 0.003          | -1.510      |
| 17544740      | Kir3dl2      | killer cell immunoglobulin-like receptor, three domains, long cytoplasmic tail, 2 [ Mus musculus (house mouse) ] | 0.037          | -1.512      |
| 17510626      | unknown      | Unknown                                                                                                          | 0.009          | -1.512      |
| 17330649      | Gm17783      | predicted gene, 17783 [ Mus musculus ]                                                                           | 0.027          | -1.518      |
| 17483383      | Snora30      | small nucleolar RNA, H/ACA box 30                                                                                | 0.044          | -1.520      |
| 17214899      | Gm7609       | predicted pseudogene 7609 [ (house mouse)]                                                                       | 0.014          | -1.522      |
| 17347983      | unknown      | Unknown                                                                                                          | 0.002          | -1.525      |
| 17247375      | unknown      | Unknown                                                                                                          | 0.019          | -1.532      |
| 17449372      | Ugt2b38      | UDP glucuronosyltransferase 2 family, polypeptide B38 [ Mus musculus (house mouse) ]                             | 0.038          | -1.539      |

| Transcript ID | Gene Symbol | Gene Name                                               | PELC@PE vs PBS |             |
|---------------|-------------|---------------------------------------------------------|----------------|-------------|
|               |             |                                                         | p-value        | Fold-Change |
| 17423802      | unknown     | Unknown                                                 | 0.034          | -1.541      |
| 17546790      | unknown     | Unknown                                                 | 0.007          | -1.544      |
| 17249034      | unknown     | Unknown                                                 | 0.001          | -1.545      |
| 17304848      | unknown     | Unknown                                                 | 0.014          | -1.555      |
| 17467427      | unknown     | Unknown                                                 | 0.016          | -1.555      |
| 17299119      | unknown     | Unknown                                                 | 0.010          | -1.562      |
| 17459095      | unknown     | Unknown                                                 | 0.001          | -1.562      |
| 17464713      | unknown     | Unknown                                                 | 0.016          | -1.566      |
| 17465339      | unknown     | Unknown                                                 | 0.007          | -1.571      |
| 17411905      | unknown     | Unknown                                                 | 0.006          | -1.576      |
| 17218042      | unknown     | Unknown                                                 | 0.031          | -1.582      |
| 17302354      | unknown     | Unknown                                                 | 0.014          | -1.585      |
| 17476637      | unknown     | Unknown                                                 | 0.001          | -1.588      |
| 17476671      | unknown     | Unknown                                                 | 0.026          | -1.597      |
| 17257593      | unknown     | Unknown                                                 | 0.025          | -1.597      |
| 17474128      | unknown     | Unknown                                                 | 0.012          | -1.604      |
| 17520288      | unknown     | Unknown                                                 | 0.007          | -1.605      |
| 17344750      | H2-M9       | histocompatibility 2, M region locus 9 [ (house mouse)] | 0.017          | -1.611      |
| 17455210      | Gm5565      | predicted gene 5565 [ Mus musculus ]                    | 0.001          | -1.629      |
| 17225085      | unknown     | Unknown                                                 | 0.047          | -1.634      |
| 17374848      | unknown     | Unknown                                                 | 0.000          | -1.639      |
| 17268376      | unknown     | Unknown                                                 | 0.034          | -1.641      |
| 17232731      | Rnu3a       | U3A small nuclear RNA [ Mus musculus ]                  | 0.025          | -1.643      |
| 17219865      | unknown     | Unknown                                                 | 0.033          | -1.652      |
| 17486216      | Vmn2r32     | vomeronasal 2, receptor 32 [ Mus musculus ]             | 0.044          | -1.654      |
| 17402979      | unknown     | Unknown                                                 | 0.015          | -1.660      |
| 17324398      | Snora81     | small nucleolar RNA, H/ACA box 81                       | 0.033          | -1.670      |
| 17448146      | unknown     | Unknown                                                 | 0.025          | -1.672      |

| Transcript ID | Gene Symbol | Gene Name                                                          | PELC@PE vs PBS |             |
|---------------|-------------|--------------------------------------------------------------------|----------------|-------------|
|               |             |                                                                    | p-value        | Fold-Change |
| 17529690      | unknown     | Unknown                                                            | 0.041          | -1.676      |
| 17476877      | unknown     | Unknown                                                            | 0.007          | -1.682      |
| 17504002      | unknown     | Unknown                                                            | 0.042          | -1.691      |
| 17234423      | Derl3       | Der1-like domain family, member 3 [ (house mouse)]                 | 0.044          | -1.694      |
| 17430885      | unknown     | Unknown                                                            | 0.012          | -1.697      |
| 17325721      | unknown     | Unknown                                                            | 0.008          | -1.698      |
| 17312079      | unknown     | Unknown                                                            | 0.044          | -1.699      |
| 17308827      | unknown     | Unknown                                                            | 0.037          | -1.700      |
| 17274408      | Gm17758     | predicted gene, 17758 [ Mus musculus (house mouse) ]               | 0.017          | -1.701      |
| 17513974      | unknown     | Unknown                                                            | 0.005          | -1.704      |
| 17411133      | unknown     | Unknown                                                            | 0.010          | -1.706      |
| 17526803      | unknown     | Unknown                                                            | 0.006          | -1.725      |
| 17398719      | unknown     | Unknown                                                            | 0.031          | -1.727      |
| 17441622      | unknown     | Unknown                                                            | 0.035          | -1.730      |
| 17491851      | unknown     | Unknown                                                            | 0.011          | -1.744      |
| 17340397      | Nanp        | N-acetylneuraminic acid phosphatase [ Mus musculus (house mouse) ] | 0.041          | -1.755      |
| 17536036      | unknown     | Unknown                                                            | 0.023          | -1.770      |
| 17339172      | unknown     | Unknown                                                            | 0.008          | -1.784      |
| 17513854      | unknown     | Unknown                                                            | 0.001          | -1.786      |
| 17244862      | unknown     | Unknown                                                            | 0.013          | -1.788      |
| 17229574      | unknown     | Unknown                                                            | 0.023          | -1.792      |
| 17458950      | Vmn1r13     | vomeronasal 1 receptor 13 [ Mus musculus (house mouse) ]           | 0.002          | -1.798      |
| 17385838      | unknown     | Unknown                                                            | 0.001          | -1.809      |
| 17463617      | unknown     | Unknown                                                            | 0.008          | -1.816      |
| 17512852      | unknown     | Unknown                                                            | 0.017          | -1.825      |
| 17477184      | Klk14       | kallikrein related-peptidase 14 [ (house mouse)]                   | 0.003          | -1.827      |
| 17514343      | unknown     | Unknown                                                            | 0.049          | -1.834      |

| Transcript ID | Gene Symbol | Gene Name                                              | PELC@PE vs PBS |             |
|---------------|-------------|--------------------------------------------------------|----------------|-------------|
|               |             |                                                        | p-value        | Fold-Change |
| 17494221      | Hbb-b1      | hemoglobin, beta adult major chain [ (house mouse)]    | 0.022          | -1.852      |
| 17248973      | Olf1387     | olfactory receptor 1387 [ Mus musculus (house mouse) ] | 0.041          | -1.877      |
| 17486261      | Vmn2r41     | Vmn2r4vomeronasal 2, receptor 41 [ (house mouse)]1     | 0.038          | -1.889      |
| 17249513      | unknown     | Unknown                                                | 0.033          | -1.891      |
| 17248494      | unknown     | Unknown                                                | 0.001          | -1.894      |
| 17508566      | unknown     | Unknown                                                | 0.021          | -2.043      |
| 17536044      | Gm5938      | predicted gene 5938 [ Mus musculus (house mouse) ]     | 0.016          | -2.292      |
| 17514349      | unknown     | Unknown                                                | 0.038          | -2.468      |
| 17540497      | unknown     | Unknown                                                | 0.022          | -3.332      |

**Supplementary Table S2.** Complete list of microarray selected hits having a p-value  $\leq 0.05$  and a fold change  $\geq |1.5|$ . Data are expressed as the average fold change of three repeats in each treatment group (PELC@MN vs PBS)

| Transcript ID | Gene Symbol   | Gene Name                                                                                   | PELC@MN vs PBS |             |
|---------------|---------------|---------------------------------------------------------------------------------------------|----------------|-------------|
|               |               |                                                                                             | p-value        | Fold-Change |
| 17481252      | Olf635        | olfactory receptor 635 [ Mus musculus (house mouse) ]                                       | 0.023          | 2.600       |
| 17398018      | unknown       | Unknown                                                                                     | 0.003          | 2.558       |
| 17501516      | unknown       | Unknown                                                                                     | 0.027          | 2.451       |
| 17395969      | unknown       | Unknown                                                                                     | 0.032          | 2.399       |
| 17511643      | Ces1a         | carboxylesterase 1A [ Mus musculus (house mouse) ]                                          | 0.025          | 2.392       |
| 17238667      | Olf787        | olfactory receptor 787 [ Mus musculus (house mouse) ]                                       | 0.020          | 2.375       |
| 17459306      | unknown       | Unknown                                                                                     | 0.003          | 2.322       |
| 17238661      | Olf782        | olfactory receptor 782 [ Mus musculus (house mouse) ]                                       | 0.020          | 2.234       |
| 17476604      | Abpe          | secretoglobin, family 2B, member 2 [ Mus musculus (house mouse) ]                           | 0.012          | 2.204       |
| 17372781      | Olf1029       | olfactory receptor 1029 [ Mus musculus (house mouse) ]                                      | 0.037          | 2.193       |
| 17459294      | Igkv1-133     | immunoglobulin kappa variable 1-133 [ Mus musculus (house mouse) ]                          | 0.027          | 2.187       |
| 17525712      | Olf937        | olfactory receptor 937 [ Mus musculus (house mouse) ]                                       | 0.002          | 2.184       |
| 17467379      | unknown       | Unknown                                                                                     | 0.001          | 2.146       |
| 17278328      | Serpina3n     | serine (or cysteine) peptidase inhibitor, clade A, member 3N [ Mus musculus (house mouse) ] | 0.027          | 2.143       |
| 17471788      | LOC100048471  | Unknown                                                                                     | 0.007          | 2.141       |
| 17544277      | unknown       | Unknown                                                                                     | 0.001          | 2.129       |
| 17225982      | unknown       | Unknown                                                                                     | 0.023          | 2.094       |
| 17306130      | unknown       | Unknown                                                                                     | 0.025          | 2.090       |
| 17507665      | AF366264      | cDNA sequence AF366264 [ (house mouse)]                                                     | 0.019          | 2.079       |
| 17288302      | Rsl1          | regulator of sex limited protein 1 [ (house mouse)]                                         | 0.003          | 2.034       |
| 17535269      | 1700020N15Rik | 1700020N15Rik RIKEN cDNA 1700020N15 gene [ (house mouse)]                                   | 0.005          | 1.974       |
| 17494422      | Olf655        | olfactory receptor 655 [ Mus musculus (house mouse) ]                                       | 0.002          | 1.968       |

| Transcript ID | Gene Symbol  | Gene Name                                                             | PELC@MN vs PBS |             |
|---------------|--------------|-----------------------------------------------------------------------|----------------|-------------|
|               |              |                                                                       | p-value        | Fold-Change |
|               |              | ]                                                                     |                |             |
| 17494144      | Olf569       | olfactory receptor 569 [ Mus musculus (house mouse) ]                 | 0.004          | 1.955       |
| 17481194      | Olf598       | olfactory receptor 598 [ Mus musculus (house mouse) ]                 | 0.025          | 1.952       |
| 17284654      | unknown      | Unknown                                                               | 0.012          | 1.947       |
| 17378072      | Bpifb4       | BPI fold containing family B, member 4 [ Mus musculus (house mouse) ] | 0.049          | 1.944       |
| 17387758      | Olf1128      | olfactory receptor 1128 [ Mus musculus (house mouse) ]                | 0.043          | 1.876       |
| 17214892      | unknown      | Unknown                                                               | 0.025          | 1.871       |
| 17467534      | Igkv6-23     | immunoglobulin kappa variable 6-23 [ (house mouse)]                   | 0.019          | 1.864       |
| 17547178      | unknown      | Unknown                                                               | 0.006          | 1.847       |
| 17516120      | Olf145       | olfactory receptor 145 [ Mus musculus (house mouse) ]                 | 0.001          | 1.837       |
| 17237975      | unknown      | Unknown                                                               | 0.010          | 1.810       |
| 17542098      | unknown      | Unknown                                                               | 0.035          | 1.804       |
| 17494447      | Olf668       | olfactory receptor 668 [ Mus musculus (house mouse) ]                 | 0.049          | 1.796       |
| 17481141      | Olf557       | olfactory receptor 557 [ Mus musculus (house mouse) ]                 | 0.014          | 1.787       |
| 17499723      | LOC100505096 | alpha-defensin 20-like mRNA [ Mus musculus ]                          | 0.013          | 1.779       |
| 17226164      | unknown      | Unknown                                                               | 0.008          | 1.758       |
| 17387810      | Olf1166      | olfactory receptor 1166 [ Mus musculus (house mouse) ]                | 0.020          | 1.757       |
| 17348400      | Gata6        | GATA binding protein 6 [ (house mouse)]                               | 0.030          | 1.755       |
| 17425200      | unknown      | Unknown                                                               | 0.021          | 1.744       |
| 17337601      | unknown      | Unknown                                                               | 0.036          | 1.740       |
| 17494256      | Olf64        | olfactory receptor 640 [ Mus musculus (house mouse) ]                 | 0.047          | 1.728       |
| 17546995      | unknown      | Unknown                                                               | 0.021          | 1.721       |
| 17372742      | unknown      | Unknown                                                               | 0.002          | 1.720       |
| 17457295      | unknown      | Unknown                                                               | 0.023          | 1.709       |

| Transcript ID | Gene Symbol   | Gene Name                                                     | PELC@MN vs PBS |             |
|---------------|---------------|---------------------------------------------------------------|----------------|-------------|
|               |               |                                                               | p-value        | Fold-Change |
| 17300024      | unknown       | Unknown                                                       | 0.018          | 1.704       |
| 17232176      | Taar2         | trace amine-associated receptor 2 [ (house mouse)]            | 0.046          | 1.704       |
| 17543742      | unknown       | Unknown                                                       | 0.022          | 1.701       |
| 17494319      | OlfR649       | olfactory receptor 649 [ Mus musculus (house mouse) ]         | 0.002          | 1.697       |
| 17285842      | Hist2h3b      | histone cluster 2, H3b [ (house mouse)]                       | 0.015          | 1.691       |
| 17238689      | OlfR808       | olfactory receptor 808 [ Mus musculus (house mouse) ]         | 0.005          | 1.688       |
| 17320811      | unknown       | Unknown                                                       | 0.014          | 1.684       |
| 17290195      | LOC639910     | mouse hypothetical protein LOC639910                          | 0.023          | 1.684       |
| 17304271      | unknown       | Unknown                                                       | 0.017          | 1.682       |
| 17486646      | Vmn1r86       | vomeronal 1 receptor 62 [ (house mouse)]                      | 0.006          | 1.677       |
| 17234363      | 4933407G14Rik | RIKEN cDNA 4933407G14 gene [ (house mouse)]                   | 0.014          | 1.675       |
| 17543139      | Mageb1        | melanoma antigen, family B, 1 [ (house mouse)]                | 0.011          | 1.669       |
| 17474692      | unknown       | Unknown                                                       | 0.037          | 1.669       |
| 17257327      | unknown       | Unknown                                                       | 0.010          | 1.660       |
| 17464037      | unknown       | Unknown                                                       | 0.042          | 1.654       |
| 17335983      | Gm9705        | cytochrome P450, family 4, subfamily f, polypeptide 37        | 0.026          | 1.654       |
| 17435170      | 6030443J06Rik | RIKEN cDNA 6030443J06 gene [ (house mouse)]                   | 0.003          | 1.653       |
| 17467516      | Igk-V28       | immunoglobulin kappa chain variable 28 (V28) [ (house mouse)] | 0.012          | 1.650       |
| 17284484      | Ighg          | immunoglobulin heavy chain complex [ (house mouse)]           | 0.003          | 1.649       |
| 17494394      | Trim30a       | tripartite motif-containing 30A [ (house mouse)]              | 0.002          | 1.646       |
| 17444059      | unknown       | Unknown                                                       | 0.000          | 1.643       |
| 17533454      | unknown       | Unknown                                                       | 0.009          | 1.641       |
| 17326933      | Krtap6-3      | keratin associated protein 6-3 [ Mus musculus (house mouse) ] | 0.040          | 1.640       |
| 17516143      | OlfR893       | olfactory receptor 893 [ Mus musculus (house mouse) ]         | 0.015          | 1.637       |
| 17299158      | LOC100044625  | Unknown                                                       | 0.037          | 1.635       |



| Transcript ID | Gene Symbol  | Gene Name                                                                       | PELC@MN vs PBS |             |
|---------------|--------------|---------------------------------------------------------------------------------|----------------|-------------|
|               |              |                                                                                 | p-value        | Fold-Change |
| 17311733      | Fer1l6       | fer-1-like 6 (C. elegans) [ (house mouse)]                                      | 0.002          | 1.631       |
| 17494267      | Olf640       | olfactory receptor 640 [ Mus musculus (house mouse) ]                           | 0.047          | 1.630       |
| 17389132      | Gm13939      | pluripotency associated transcript 8 [ Mus musculus (house mouse) ]             | 0.021          | 1.629       |
| 17257597      | unknown      | Unknown                                                                         | 0.043          | 1.627       |
| 17503926      | Mt4          | metallothionein 4 [ (house mouse)]                                              | 0.027          | 1.622       |
| 17364365      | unknown      | Unknown                                                                         | 0.043          | 1.622       |
| 17246435      | Olf810       | olfactory receptor 810 [ Mus musculus (house mouse) ]                           | 0.044          | 1.618       |
| 17417819      | Olf1339      | olfactory receptor 1339 [ Mus musculus (house mouse) ]                          | 0.008          | 1.617       |
| 17379887      | unknown      | Unknown                                                                         | 0.018          | 1.616       |
| 17385369      | unknown      | Unknown                                                                         | 0.015          | 1.615       |
| 17513963      | unknown      | Unknown                                                                         | 0.034          | 1.614       |
| 17337614      | Olf127       | olfactory receptor 127 [ Mus musculus (house mouse) ]                           | 0.001          | 1.607       |
| 17516274      | Olf961       | olfactory receptor 961 [ Mus musculus (house mouse) ]                           | 0.000          | 1.607       |
| 17305937      | Olf726       | olfactory receptor 726 [ Mus musculus (house mouse) ]                           | 0.028          | 1.606       |
| 17299965      | unknown      | Unknown                                                                         | 0.020          | 1.603       |
| 17298729      | unknown      | Unknown                                                                         | 0.012          | 1.603       |
| 17495622      | Gp2          | glycoprotein 2 (zymogen granule membrane) [ (house mouse)]                      | 0.018          | 1.602       |
| 17512891      | LOC100861869 | Unknown                                                                         | 0.017          | 1.601       |
| 17233792      | unknown      | Unknown                                                                         | 0.007          | 1.599       |
| 17372771      | Olf1022      | olfactory receptor 1022 [ Mus musculus (house mouse) ]                          | 0.021          | 1.595       |
| 17481334      | Dub1         | ubiquitin specific peptidase 17-like A [ (house mouse)]                         | 0.015          | 1.592       |
| 17294034      | Zfp71-rs1    | zinc finger protein 71, related sequence 1 [Mus musculus]                       | 0.021          | 1.590       |
| 17482230      | Acsm5        | acyl-CoA synthetase medium-chain family member 5 [ Mus musculus (house mouse) ] | 0.002          | 1.587       |

| Transcript ID | Gene Symbol   | Gene Name                                                                                | PELC@MN vs PBS |             |
|---------------|---------------|------------------------------------------------------------------------------------------|----------------|-------------|
|               |               |                                                                                          | p-value        | Fold-Change |
| 17262218      | Gm12185       | predicted gene 12185 [ (house mouse)]                                                    | 0.022          | 1.585       |
| 17536653      | unknown       | Unknown                                                                                  | 0.022          | 1.577       |
| 17474278      | Ceacam5       | carcinoembryonic antigen-related cell adhesion molecule 5 [ Mus musculus (house mouse) ] | 0.017          | 1.576       |
| 17501308      | Gm2921        | predicted gene 2921 [ (house mouse)]                                                     | 0.040          | 1.569       |
| 17355076      | unknown       | Unknown                                                                                  | 0.019          | 1.569       |
| 17291222      | Hist2h3b      | histone cluster 2, H3b [ (house mouse)]                                                  | 0.010          | 1.568       |
| 17502366      | Olf372        | olfactory receptor 372 [ Mus musculus (house mouse) ]                                    | 0.023          | 1.566       |
| 17239769      | Taar9         | trace amine-associated receptor 9 [ (house mouse)]                                       | 0.040          | 1.564       |
| 17516147      | Olf143        | olfactory receptor 143 [ Mus musculus (house mouse) ]                                    | 0.024          | 1.558       |
| 17459005      | Vmn1r28       | vomer nasal 1 receptor 28 [ Mus musculus (house mouse) ]                                 | 0.022          | 1.554       |
| 17287792      | unknown       | Unknown                                                                                  | 0.045          | 1.549       |
| 17308759      | 4930444M15Rik | RIKEN cDNA 4930444M15 gene [ (house mouse)]                                              | 0.025          | 1.548       |
| 17506945      | unknown       | Unknown                                                                                  | 0.035          | 1.547       |
| 17448226      | unknown       | Unknown                                                                                  | 0.029          | 1.546       |
| 17481182      | Olf594        | olfactory receptor 594 [ Mus musculus (house mouse) ]                                    | 0.004          | 1.545       |
| 17211562      | unknown       | Unknown                                                                                  | 0.043          | 1.545       |
| 17228291      | unknown       | Unknown                                                                                  | 0.021          | 1.544       |
| 17544162      | unknown       | Unknown                                                                                  | 0.021          | 1.544       |
| 17366922      | Mir669m-1     | microRNA 669m-1 [ (house mouse)]                                                         | 0.045          | 1.543       |
| 17319753      | unknown       | Unknown                                                                                  | 0.010          | 1.542       |
| 17512868      | Chst4         | carbohydrate (chondroitin 6/keratan) sulfotransferase 4 [ Mus musculus (house mouse) ]   | 0.018          | 1.542       |
| 17421327      | unknown       | Unknown                                                                                  | 0.045          | 1.541       |
| 17481215      | Olf617        | olfactory receptor 617 [ Mus musculus (house mouse) ]                                    | 0.034          | 1.539       |
| 17381626      | 8030442B05Rik | RIKEN cDNA 8030442B05 gene [ Mus musculus (house mouse) ]                                | 0.001          | 1.537       |

| Transcript ID | Gene Symbol   | Gene Name                                                                                                     | PELC@MN vs PBS |             |
|---------------|---------------|---------------------------------------------------------------------------------------------------------------|----------------|-------------|
|               |               |                                                                                                               | p-value        | Fold-Change |
| 17471744      | Klra14        | killer cell lectin-like receptor subfamily A, member 14, pseudogene [ Mus musculus (house mouse) ]            | 0.015          | 1.536       |
| 17277659      | BB287469      | expressed sequence BB287469 [ (house mouse)]                                                                  | 0.023          | 1.536       |
| 17412636      | unknown       | Unknown                                                                                                       | 0.027          | 1.535       |
| 17411101      | unknown       | Unknown                                                                                                       | 0.016          | 1.533       |
| 17374188      | Olf1285       | olfactory receptor 1285 [ Mus musculus (house mouse) ]                                                        | 0.031          | 1.532       |
| 17467477      | unknown       | Unknown                                                                                                       | 0.018          | 1.531       |
| 17311310      | unknown       | Unknown                                                                                                       | 0.046          | 1.530       |
| 17531799      | Mir128-2      | microRNA 128-2 [ (house mouse)]                                                                               | 0.014          | 1.529       |
| 17378238      | 1700007I08Rik | actin-like 10 [ Mus musculus (house mouse) ]                                                                  | 0.008          | 1.527       |
| 17280932      | unknown       | Unknown                                                                                                       | 0.047          | 1.526       |
| 17494115      | Olf1553       | olfactory receptor 553 [ Mus musculus (house mouse) ]                                                         | 0.010          | 1.524       |
| 17543889      | unknown       | Unknown                                                                                                       | 0.008          | 1.524       |
| 17284423      | Ighg          | immunoglobulin heavy chain complex [ (house mouse)]                                                           | 0.047          | 1.522       |
| 17489954      | LOC546957     | Unknown                                                                                                       | 0.032          | 1.518       |
| 17241729      | Phyhip1       | phytanoyl-CoA hydroxylase interacting protein-like [ Mus musculus (house mouse) ]                             | 0.002          | 1.516       |
| 17481196      | Olf1599       | olfactory receptor 599 [ Mus musculus (house mouse) ]                                                         | 0.041          | 1.512       |
| 17278713      | Rtl1          | retrotransposon-like 1 [ (house mouse)]                                                                       | 0.002          | 1.511       |
| 17513641      | Slc7a5        | solute carrier family 7 (cationic amino acid transporter, y+ system), member 5 [ Mus musculus (house mouse) ] | 0.002          | 1.509       |
| 17481171      | Olf1584       | olfactory receptor 584 [ Mus musculus (house mouse) ]                                                         | 0.048          | 1.507       |
| 17421103      | B330016D10Rik | RIKEN cDNA B330016D10 gene [ Mus musculus (house mouse) ]                                                     | 0.021          | 1.507       |
| 17546158      | unknown       | Unknown                                                                                                       | 0.024          | 1.507       |
| 17331436      | unknown       | Unknown                                                                                                       | 0.048          | 1.505       |
| 17514355      | unknown       | Unknown                                                                                                       | 0.022          | 1.503       |

| Transcript ID | Gene Symbol   | Gene Name                                                                       | PELC@MN vs PBS |             |
|---------------|---------------|---------------------------------------------------------------------------------|----------------|-------------|
|               |               |                                                                                 | p-value        | Fold-Change |
| 17525710      | Olf936        | olfactory receptor 936 [ Mus musculus (house mouse) ]                           | 0.024          | 1.502       |
| 17478799      | unknown       | Unknown                                                                         | 0.004          | 1.502       |
| 17503808      | unknown       | Unknown                                                                         | 0.010          | 1.501       |
| 17299135      | unknown       | Unknown                                                                         | 0.009          | 1.501       |
| 17285240      | unknown       | Unknown                                                                         | 0.003          | 1.500       |
| 17423802      | unknown       | Unknown                                                                         | 0.040          | -1.503      |
| 17278236      | unknown       | Unknown                                                                         | 0.027          | -1.504      |
| 17324125      | Polr2h        | polymerase (RNA) II (DNA directed) polypeptide H [ Mus musculus (house mouse) ] | 0.047          | -1.505      |
| 17432521      | C87977        | expressed sequence C87977 [ (house mouse)]                                      | 0.047          | -1.507      |
| 17324475      | A230028O05Rik | RIKEN cDNA A230028O05 gene [ Mus musculus (house mouse) ]                       | 0.021          | -1.508      |
| 17337152      | H2-Q10        | H2-Q10 histocompatibility 2, Q region locus 10 [ (house mouse)]                 | 0.013          | -1.509      |
| 17363755      | unknown       | Unknown                                                                         | 0.046          | -1.510      |
| 17344126      | Hspa1b        | heat shock protein 1B [ (house mouse)]                                          | 0.039          | -1.510      |
| 17476637      | unknown       | Unknown                                                                         | 0.001          | -1.512      |
| 17404652      | unknown       | Unknown                                                                         | 0.000          | -1.515      |
| 17425028      | Hemgn         | hemogen                                                                         | 0.043          | -1.518      |
| 17325365      | unknown       | Unknown                                                                         | 0.002          | -1.521      |
| 17402979      | unknown       | Unknown                                                                         | 0.027          | -1.522      |
| 17482912      | unknown       | Unknown                                                                         | 0.002          | -1.524      |
| 17408123      | Cd160         | CD160 antigen [ Mus musculus (house mouse) ]                                    | 0.036          | -1.527      |
| 17240085      | unknown       | Unknown                                                                         | 0.035          | -1.527      |
| 17235855      | unknown       | Unknown                                                                         | 0.009          | -1.528      |
| 17317264      | unknown       | Unknown                                                                         | 0.026          | -1.531      |
| 17490953      | unknown       | Unknown                                                                         | 0.001          | -1.535      |
| 17439365      | unknown       | Unknown                                                                         | 0.015          | -1.539      |
| 17474361      | Sycp1-ps1     | synaptonemal complex protein 1, pseudogene 1 [ Mus musculus (house mouse) ]     | 0.043          | -1.542      |

| Transcript ID | Gene Symbol | Gene Name                                                             | PELC@MN vs PBS |             |
|---------------|-------------|-----------------------------------------------------------------------|----------------|-------------|
|               |             |                                                                       | p-value        | Fold-Change |
| 17439764      | unknown     | Unknown                                                               | 0.032          | -1.548      |
| 17396339      | unknown     | Unknown                                                               | 0.003          | -1.548      |
| 17380093      | unknown     | Unknown                                                               | 0.025          | -1.555      |
| 17476877      | unknown     | Unknown                                                               | 0.013          | -1.558      |
| 17280254      | Gm5433      | predicted gene 5433 [ (house mouse)]                                  | 0.047          | -1.558      |
| 17519314      | unknown     | Unknown                                                               | 0.025          | -1.560      |
| 17302354      | unknown     | Unknown                                                               | 0.016          | -1.561      |
| 17325721      | unknown     | Unknown                                                               | 0.014          | -1.564      |
| 17307963      | Ebf2        | early B cell factor 2 [ (house mouse)]                                | 0.014          | -1.568      |
| 17430209      | unknown     | Unknown                                                               | 0.002          | -1.568      |
| 17266182      | unknown     | Unknown                                                               | 0.018          | -1.572      |
| 17218760      | unknown     | Unknown                                                               | 0.015          | -1.572      |
| 17268376      | unknown     | Unknown                                                               | 0.043          | -1.577      |
| 17219865      | unknown     | Unknown                                                               | 0.043          | -1.578      |
| 17513974      | unknown     | Unknown                                                               | 0.009          | -1.589      |
| 17232731      | Rnu3a       | U3A small nuclear RNA [ (house mouse)]                                | 0.031          | -1.595      |
| 17455210      | Gm5565      | predicted gene 5565 [ Mus musculus (house mouse) ]                    | 0.002          | -1.596      |
| 17518318      | unknown     | Unknown                                                               | 0.013          | -1.599      |
| 17293982      | Zfp874b     | zinc finger protein 874b [ Mus musculus (house mouse) ]               | 0.021          | -1.604      |
| 17300030      | unknown     | Unknown                                                               | 0.024          | -1.606      |
| 17512852      | unknown     | Unknown                                                               | 0.034          | -1.620      |
| 17381190      | Gm14496     | predicted gene 14496 [ (house mouse)]                                 | 0.027          | -1.620      |
| 17438993      | unknown     | Unknown                                                               | 0.009          | -1.625      |
| 17512084      | unknown     | Unknown                                                               | 0.021          | -1.630      |
| 17398719      | unknown     | Unknown                                                               | 0.043          | -1.631      |
| 17244862      | unknown     | Unknown                                                               | 0.023          | -1.633      |
| 17494431      | Dub3        | ubiquitin specific peptidase 17-like E [ Mus musculus (house mouse) ] | 0.035          | -1.641      |

| Transcript ID | Gene Symbol | Gene Name                                                                 | PELC@MN vs PBS |             |
|---------------|-------------|---------------------------------------------------------------------------|----------------|-------------|
|               |             |                                                                           | p-value        | Fold-Change |
| 17347983      | unknown     | Unknown                                                                   | 0.001          | -1.647      |
| 17366810      | Mir669a-1   | microRNA 669a-1 [ (house mouse)]                                          | 0.010          | -1.673      |
| 17366846      | Mir669a-1   | microRNA 669a-1 [ (house mouse)]                                          | 0.010          | -1.673      |
| 17339172      | unknown     | Unknown                                                                   | 0.010          | -1.697      |
| 17409619      | unknown     | Unknown                                                                   | 0.032          | -1.703      |
| 17331824      | Cldn17      | claudin 17 [ (house mouse)]                                               | 0.048          | -1.704      |
| 17404230      | Gm5150      | predicted gene 5150 [ (house mouse)]                                      | 0.015          | -1.709      |
| 17520288      | unknown     | Unknown                                                                   | 0.004          | -1.712      |
| 17406323      | MNE1        | meiotic nuclear divisions 1 [ (house mouse)]                              | 0.013          | -1.726      |
| 17526803      | unknown     | Unknown                                                                   | 0.006          | -1.742      |
| 17393535      | unknown     | Unknown                                                                   | 0.025          | -1.743      |
| 17225113      | Gm19524     | predicted gene 19524 [ (house mouse)]                                     | 0.006          | -1.756      |
| 17285527      | unknown     | Unknown                                                                   | 0.006          | -1.761      |
| 17289009      | Hapln1      | hyaluronan and proteoglycan link protein 1 [ Mus musculus (house mouse) ] | 0.043          | -1.761      |
| 17395039      | unknown     | Unknown                                                                   | 0.047          | -1.787      |
| 17296565      | Gm2888      | predicted gene 2888 [ (house mouse)]                                      | 0.025          | -1.797      |
| 17400118      | unknown     | Unknown                                                                   | 0.025          | -1.802      |
| 17225085      | unknown     | Unknown                                                                   | 0.026          | -1.815      |
| 17324398      | Snora81     | small nucleolar RNA, H/ACA box 81 [ Mus musculus (house mouse) ]          | 0.020          | -1.818      |
| 17218042      | unknown     | Unknown                                                                   | 0.013          | -1.820      |
| 17477184      | Klk14       | kallikrein related-peptidase 14 [ Mus musculus (house mouse) ]            | 0.003          | -1.827      |
| 17429918      | unknown     | Unknown                                                                   | 0.001          | -1.849      |
| 17529690      | unknown     | Unknown                                                                   | 0.024          | -1.851      |
| 17464713      | unknown     | Unknown                                                                   | 0.005          | -1.856      |
| 17312079      | unknown     | Unknown                                                                   | 0.026          | -1.883      |
| 17430885      | unknown     | Unknown                                                                   | 0.005          | -1.928      |
| 17385838      | unknown     | Unknown                                                                   | 0.000          | -1.938      |

| Transcript ID | Gene Symbol | Gene Name                                                | PELC@MN vs PBS |             |
|---------------|-------------|----------------------------------------------------------|----------------|-------------|
|               |             |                                                          | p-value        | Fold-Change |
| 17292327      | Mirlet7f-1  | microRNA let7f-1 [ (house mouse)]                        | 0.019          | -1.949      |
| 17528615      | unknown     | Unknown                                                  | 0.036          | -1.968      |
| 17248494      | unknown     | Unknown                                                  | 0.001          | -2.061      |
| 17270607      | unknown     | Unknown                                                  | 0.002          | -2.080      |
| 17249513      | unknown     | Unknown                                                  | 0.020          | -2.117      |
| 17491851      | unknown     | Unknown                                                  | 0.004          | -2.132      |
| 17494221      | Hbb-b1      | hemoglobin, beta adult major chain [ (house mouse)]      | 0.011          | -2.155      |
| 17248973      | Olf1387     | olfactory receptor 1387 [ Mus musculus (house mouse) ]   | 0.022          | -2.173      |
| 17505877      | Clec3a      | C-type lectin domain family 3, member a [ (house mouse)] | 0.027          | -2.389      |
| 17540497      | unknown     | Unknown                                                  | 0.031          | -2.961      |

**Supplementary Table S3.** Complete list of microarray selected hits having a p-value  $\leq 0.05$  and a fold change  $\geq |1.5|$ . Data are expressed as the average fold change of three repeats in each treatment group (PELC@MN vs PELC@PE)

| Transcript ID | Gene Symbol | Gene Name                                                                | PELC@MN vs PELC@PE |             |
|---------------|-------------|--------------------------------------------------------------------------|--------------------|-------------|
|               |             |                                                                          | p-value            | Fold-Change |
| 17322507      | Dnase1      | deoxyribonuclease I [ (house mouse)]                                     | 0.021              | 5.442       |
| 17399858      | Sprr2a2     | small proline-rich protein 2A2 [ (house mouse)]                          | 0.032              | 2.661       |
| 17472129      | Gucy2c      | guanylate cyclase 2c [ (house mouse)]                                    | 0.023              | 2.629       |
| 17368200      | Gm13539     | predicted gene 13539 [ (house mouse)]                                    | 0.014              | 2.432       |
| 17476604      | Abpe        | secretoglobin, family 2B, member 2 [ Mus musculus (house mouse) ]        | 0.009              | 2.357       |
| 17234423      | Derl3       | Der1-like domain family, member 3 [ (house mouse)]                       | 0.010              | 2.285       |
| 17495622      | Gp2         | glycoprotein 2 (zymogen granule membrane) [ (house mouse)]               | 0.003              | 2.243       |
| 17459398      | unknown     | Unknown                                                                  | 0.040              | 2.191       |
| 17300040      | unknown     | Unknown                                                                  | 0.034              | 2.181       |
| 17214892      | unknown     | Unknown                                                                  | 0.012              | 2.171       |
| 17274188      | unknown     | Unknown                                                                  | 0.012              | 2.156       |
| 17305381      | unknown     | Unknown                                                                  | 0.040              | 2.144       |
| 17444481      | Bhlha15     | basic helix-loop-helix family, member a15 [ Mus musculus (house mouse) ] | 0.006              | 2.089       |
| 17308827      | unknown     | Unknown                                                                  | 0.016              | 1.992       |
| 17337679      | Gm17495     | exocrine gland secreted peptide 8 [ Mus musculus (house mouse) ]         | 0.020              | 1.984       |
| 17514328      | unknown     | Unknown                                                                  | 0.013              | 1.981       |
| 17467534      | Igkv6-23    | immunoglobulin kappa variable 6-23 [ (house mouse)]                      | 0.015              | 1.943       |
| 17295569      | Naip2       | NLR family, apoptosis inhibitory protein 2 [ (house mouse)]              | 0.025              | 1.922       |
| 17514355      | unknown     | Unknown                                                                  | 0.005              | 1.907       |
| 17427928      | Dio1        | deiodinase, iodothyronine, type I [ (house mouse)]                       | 0.039              | 1.900       |
| 17329316      | Dgkg        | diacylglycerol kinase, gamma [ (house mouse)]                            | 0.024              | 1.871       |
| 17459306      | unknown     | Unknown                                                                  | 0.008              | 1.868       |
| 17374848      | unknown     | Unknown                                                                  | 0.000              | 1.863       |
| 17325044      | Slc12a8     | solute carrier family 12 (potassium/chloride                             | 0.015              | 1.859       |



| Transcript ID | Gene Symbol   | Gene Name                                                                  | PELC@MN vs PELC@PE |             |
|---------------|---------------|----------------------------------------------------------------------------|--------------------|-------------|
|               |               |                                                                            | p-value            | Fold-Change |
|               |               | transporters), member 8 [ Mus musculus (house mouse) ]                     |                    |             |
| 17514346      | unknown       | Unknown                                                                    | 0.023              | 1.854       |
| 17300024      | unknown       | Unknown                                                                    | 0.011              | 1.846       |
| 17234363      | 4933407G14Rik | RIKEN cDNA 4933407G14 gene [ Mus musculus (house mouse) ]                  | 0.008              | 1.843       |
| 17284585      | V165-D-J-C mu | IgM variable region [ Mus musculus (house mouse) ]                         | 0.041              | 1.835       |
| 17476671      | unknown       | Unknown                                                                    | 0.011              | 1.828       |
| 17340397      | Nanp          | N-acetylneuraminic acid phosphatase [ Mus musculus (house mouse) ]         | 0.035              | 1.805       |
| 17467447      | unknown       | Unknown                                                                    | 0.040              | 1.802       |
| 17504002      | unknown       | Unknown                                                                    | 0.032              | 1.779       |
| 17299119      | unknown       | Unknown                                                                    | 0.004              | 1.771       |
| 17273240      | Pycr1         | pyrroline-5-carboxylate reductase 1 [ Mus musculus (house mouse) ]         | 0.008              | 1.763       |
| 17457737      | Try10         | trypsin 10 [ (house mouse)]                                                | 0.028              | 1.760       |
| 17387886      | Olf1218       | olfactory receptor 1218 [ Mus musculus (house mouse) ]                     | 0.007              | 1.758       |
| 17536036      | unknown       | Unknown                                                                    | 0.024              | 1.755       |
| 17467379      | unknown       | Unknown                                                                    | 0.003              | 1.751       |
| 17493395      | unknown       | Unknown                                                                    | 0.038              | 1.743       |
| 17536052      | Obp1b         | odorant binding protein 1B [ Mus musculus (house mouse) ]                  | 0.022              | 1.741       |
| 17216127      | Gm7889        | predicted gene 7889 [ Mus musculus (house mouse) ]                         | 0.048              | 1.736       |
| 17341303      | Fpr-rs6       | formyl peptide receptor, related sequence 6 [ Mus musculus (house mouse) ] | 0.036              | 1.730       |
| 17238652      | unknown       | Unknown                                                                    | 0.034              | 1.717       |
| 17220186      | unknown       | Unknown                                                                    | 0.046              | 1.716       |
| 17398018      | unknown       | Unknown                                                                    | 0.019              | 1.715       |
| 17373634      | unknown       | Unknown                                                                    | 0.037              | 1.709       |
| 17289016      | Gm4117        | predicted gene 4117 [ Mus musculus (house mouse) ]                         | 0.015              | 1.702       |
| 17540743      | Slx           | Sycp3 like X-linked [ Mus musculus (house mouse) ]                         | 0.042              | 1.690       |

| Transcript ID | Gene Symbol  | Gene Name                                                                                          | PELC@MN vs PELC@PE |             |
|---------------|--------------|----------------------------------------------------------------------------------------------------|--------------------|-------------|
|               |              |                                                                                                    | p-value            | Fold-Change |
| 17274405      | Gm19924      | predicted gene 19924 [ Mus musculus (house mouse) ]                                                | 0.009              | 1.688       |
| 17333776      | Vmn2r96      | vomeronasal 2, receptor 96 [ Mus musculus (house mouse) ]                                          | 0.009              | 1.687       |
| 17520111      | unknown      | Unknown                                                                                            | 0.014              | 1.686       |
| 17544870      | Ripply1      | rippy transcriptional repressor 1 [ Mus musculus (house mouse) ]                                   | 0.017              | 1.684       |
| 17219164      | Sh2d1b2      | SH2 domain containing 1B2 [ (house mouse)]                                                         | 0.030              | 1.674       |
| 17546382      | unknown      | Unknown                                                                                            | 0.013              | 1.673       |
| 17458950      | Vmn1r13      | vomeronasal 1 receptor 13 [ (house mouse)]                                                         | 0.004              | 1.669       |
| 17424968      | Gm12409      | predicted gene 12409 [ Mus musculus (house mouse) ]                                                | 0.000              | 1.668       |
| 17471744      | Klra14       | killer cell lectin-like receptor subfamily A, member 14, pseudogene [ Mus musculus (house mouse) ] | 0.009              | 1.661       |
| 17217237      | Gm10538      | predicted gene 10538 [ Mus musculus (house mouse) ]                                                | 0.047              | 1.659       |
| 17463451      | unknown      | Unknown                                                                                            | 0.022              | 1.655       |
| 17341905      | Rab26        | RAB26, member RAS oncogene family [ Mus musculus (house mouse) ]                                   | 0.048              | 1.631       |
| 17543139      | Mageb1       | melanoma antigen, family B, 1 [ (house mouse)]                                                     | 0.013              | 1.629       |
| 17284390      | unknown      | Unknown                                                                                            | 0.003              | 1.629       |
| 17458377      | Gimap1       | GTPase, IMAP family member 1 [ Mus musculus (house mouse) ]                                        | 0.008              | 1.622       |
| 17543742      | unknown      | Unknown                                                                                            | 0.030              | 1.620       |
| 17299158      | LOC100044625 | Unknown                                                                                            | 0.039              | 1.617       |
| 17238671      | Olfir790     | olfactory receptor 790 [ Mus musculus (house mouse) ]                                              | 0.004              | 1.598       |
| 17284423      | Ighg         | immunoglobulin heavy chain complex [ (house mouse)]                                                | 0.034              | 1.592       |
| 17306991      | Gzmd         | granzyme D [ (house mouse)]                                                                        | 0.002              | 1.592       |
| 17388347      | unknown      | Unknown                                                                                            | 0.006              | 1.587       |
| 17388681      | Rag2         | recombination activating gene 2 [ Mus musculus (house mouse) ]                                     | 0.027              | 1.581       |
| 17315178      | Nr4a1        | nuclear receptor subfamily 4, group A, member 1 [ Mus musculus (house mouse) ]                     | 0.006              | 1.580       |
| 17294051      | unknown      | Unknown                                                                                            | 0.003              | 1.578       |
| 17472023      | Mansc1       | MANSC domain containing 1 [ Mus musculus (house                                                    | 0.021              | 1.572       |

| Transcript ID | Gene Symbol   | Gene Name                                                                                                     | PELC@MN vs PELC@PE |             |
|---------------|---------------|---------------------------------------------------------------------------------------------------------------|--------------------|-------------|
|               |               |                                                                                                               | p-value            | Fold-Change |
|               |               | mouse) ]                                                                                                      |                    |             |
| 17366864      | unknown       | Unknown                                                                                                       | 0.026              | 1.571       |
| 17325933      | Gm6030        | predicted gene 6030 [ Mus musculus (house mouse) ]                                                            | 0.018              | 1.571       |
| 17535108      | unknown       | Unknown                                                                                                       | 0.009              | 1.571       |
| 17480489      | unknown       | Unknown                                                                                                       | 0.009              | 1.569       |
| 17448146      | unknown       | Unknown                                                                                                       | 0.038              | 1.568       |
| 17459423      | Igkv4-53      | immunoglobulin kappa variable 4-53 [ Mus musculus (house mouse) ]                                             | 0.037              | 1.564       |
| 17445992      | unknown       | Unknown                                                                                                       | 0.029              | 1.556       |
| 17344696      | unknown       | Unknown                                                                                                       | 0.013              | 1.551       |
| 17493310      | unknown       | Unknown                                                                                                       | 0.048              | 1.549       |
| 17486646      | Vmn1r86       | vomer nasal 1 receptor 86 [ (house mouse)]                                                                    | 0.011              | 1.545       |
| 17502603      | Rasd2         | RASD family, member 2 [ (house mouse)]                                                                        | 0.017              | 1.543       |
| 17448595      | Gabra4        | gamma-aminobutyric acid (GABA) A receptor, subunit alpha 4 [ Mus musculus (house mouse) ]                     | 0.049              | 1.541       |
| 17342770      | Spdef         | SAM pointed domain containing ets transcription factor [ Mus musculus (house mouse) ]                         | 0.004              | 1.537       |
| 17424822      | Gne           | glucosamine (UDP-N-acetyl)-2-epimerase/N-acetylmannosamine kinase [ Mus musculus (house mouse) ]              | 0.029              | 1.536       |
| 17233507      | BB019430      | expressed sequence BB019430 [ Mus musculus (house mouse) ]                                                    | 0.001              | 1.535       |
| 17237280      | Phlda1        | pleckstrin homology like domain, family A, member 1 [ Mus musculus (house mouse) ]                            | 0.025              | 1.535       |
| 17328742      | Slc7a4        | solute carrier family 7 (cationic amino acid transporter, y+ system), member 4 [ Mus musculus (house mouse) ] | 0.005              | 1.535       |
| 17244911      | unknown       | Unknown                                                                                                       | 0.013              | 1.533       |
| 17387723      | Olf1099       | olfactory receptor 1099 [ Mus musculus (house mouse) ]                                                        | 0.022              | 1.533       |
| 17524336      | Olf850        | olfactory receptor 850 [ Mus musculus (house mouse) ]                                                         | 0.024              | 1.531       |
| 17535269      | 1700020N15Rik | 1700020N15Rik RIKEN cDNA 1700020N15 gene [ (house mouse)]                                                     | 0.026              | 1.531       |
| 17279948      | unknown       | Unknown                                                                                                       | 0.005              | 1.528       |
| 17444059      | unknown       | Unknown                                                                                                       | 0.000              | 1.523       |

| Transcript ID | Gene Symbol | Gene Name                                                                                    | PELC@MN vs PELC@PE |             |
|---------------|-------------|----------------------------------------------------------------------------------------------|--------------------|-------------|
|               |             |                                                                                              | p-value            | Fold-Change |
| 17523201      | Myrip       | myosin VIIA and Rab interacting protein [ Mus musculus (house mouse) ]                       | 0.006              | 1.519       |
| 17284512      | unknown     | Unknown                                                                                      | 0.046              | 1.519       |
| 17298729      | unknown     | Unknown                                                                                      | 0.018              | 1.518       |
| 17314679      | Tuba1b      | tubulin, alpha 1B [ Mus musculus (house mouse) ]                                             | 0.009              | 1.518       |
| 17413942      | unknown     | Unknown                                                                                      | 0.029              | 1.516       |
| 17489962      | unknown     | Unknown                                                                                      | 0.049              | 1.514       |
| 17536736      | Gjb1        | gap junction protein, beta 1 [ (house mouse)]                                                | 0.007              | 1.514       |
| 17546995      | unknown     | Unknown                                                                                      | 0.048              | 1.512       |
| 17491505      | unknown     | Unknown                                                                                      | 0.004              | 1.512       |
| 17284484      | Ighg        | immunoglobulin heavy chain complex [ (house mouse)]                                          | 0.005              | 1.512       |
| 17535045      | Gm14718     | predicted gene 14718 [ Mus musculus (house mouse) ]                                          | 0.005              | 1.509       |
| 17467365      | unknown     | Unknown                                                                                      | 0.000              | 1.502       |
| 17424848      | unknown     | Unknown                                                                                      | 0.024              | 1.502       |
| 17450501      | Gbp10       | guanylate-binding protein 10 [ (house mouse)]                                                | 0.047              | -2.017      |
| 17464943      | Ppp1r3a     | protein phosphatase 1, regulatory (inhibitor) subunit 3A [ Mus musculus (house mouse) ]      | 0.014              | -2.024      |
| 17345797      | Apobec2     | apolipoprotein B mRNA editing enzyme, catalytic polypeptide 2 [ Mus musculus (house mouse) ] | 0.035              | -2.026      |
| 17371296      | Xirp2       | xin actin-binding repeat containing 2 [ Mus musculus (house mouse) ]                         | 0.032              | -2.078      |
| 17292327      | Mirlet7f-1  | microRNA let7f-1 [ (house mouse)]                                                            | 0.013              | -2.098      |
| 17232453      | Trdn        | triadin [ Mus musculus (house mouse) ]                                                       | 0.014              | -2.183      |
| 17467519      | Igkv8-30    | immunoglobulin kappa chain variable 8-30 [ Mus musculus ]                                    | 0.012              | -2.226      |
| 17416685      | unknown     | Unknown                                                                                      | 0.002              | -2.681      |

**Supplementary Table S4. Core response gene list**

| Transcript ID             | Gene Symbol   | Gene Name                                                                                                        |
|---------------------------|---------------|------------------------------------------------------------------------------------------------------------------|
| Mucosal/cell permeability |               |                                                                                                                  |
| 17361878                  | Slc22a20      | Mus musculus solute carrier family 22 (organic anion transporter), member 20 (Slc22a20), mRNA                    |
| 17378035                  | Bpifb6        | BPI fold containing family B, member 6 [ Mus musculus (house mouse) ]                                            |
| 17378072                  | Bpifb4        | BPI fold containing family B, member 4 [ Mus musculus (house mouse) ]                                            |
| 17517360                  | Sln           | sarcolipin [ (house mouse)]                                                                                      |
| 17352957                  | Dsc1          | desmocollin 1 [ (house mouse)]                                                                                   |
| 17225253                  | Kcnj13        | potassium inwardly-rectifying channel, subfamily J, member 13 [ Mus musculus (house mouse) ]                     |
| 17271143                  | Cacng1        | calcium channel, voltage-dependent, gamma subunit 1 [ Mus musculus (house mouse) ]                               |
| 17495622                  | Gp2           | glycoprotein 2 (zymogen granule membrane) [ (house mouse)]                                                       |
| 17513641                  | Slc7a5        | solute carrier family 7 (cationic amino acid transporter, y+ system), member 5 [ Mus musculus (house mouse) ]    |
| 17331824                  | Cldn17        | claudin 17 [ (house mouse)]                                                                                      |
| 17325044                  | Slc12a8       | solute carrier family 12 (potassium/chloride transporters), member 8 [ Mus musculus (house mouse) ]              |
| 17328742                  | Slc7a4        | solute carrier family 7 (cationic amino acid transporter, y+ system), member 4 [ Mus musculus (house mouse) ]    |
| 17536736                  | Gjb1          | gap junction protein, beta 1 [ (house mouse)]                                                                    |
| Immune responses          |               |                                                                                                                  |
| 17467519                  | Igkv8-30      | immunoglobulin kappa chain variable 8-30 [ Mus musculus ]                                                        |
| 17499613                  | Defb3         | defensin beta 3 [ (house mouse)]                                                                                 |
| 17537906                  | Kir3dl1       | killer cell immunoglobulin-like receptor, three domains, long cytoplasmic tail, 1 [ Mus musculus (house mouse) ] |
| 17343856                  | Btnl5         | butyrophilin-like 5 [ Mus musculus (house mouse) ]                                                               |
| 17326887                  | ORF63         | Map3k7 C-terminal like [ Mus musculus (house mouse) ]                                                            |
| 17358825                  | I830012O16Rik | interferon-induced protein with tetratricopeptide repeats 3B [ Mus musculus (house mouse) ]                      |
| 17367644                  | Il1f8         | interleukin 1 family, member 8 [ (house mouse)]                                                                  |
| 17494394                  | Trim30a       | tripartite motif-containing 30A [ (house mouse)]                                                                 |
| 17499576                  | Defb34        | defensin beta 34 [ Mus musculus (house mouse) ]                                                                  |
| 17404337                  | Cpa3          | carboxypeptidase A3, mast cell [ Mus musculus (house mouse) ]                                                    |

| Transcript ID | Gene Symbol   | Gene Name                                                                                                        |
|---------------|---------------|------------------------------------------------------------------------------------------------------------------|
| 17487054      | Psg26         | pregnancy-specific glycoprotein 26 [ Mus musculus (house mouse) ]                                                |
| 17367666      | Il1f5         | interleukin 1 family, member 5 (delta) [ (house mouse)]                                                          |
| 17367659      | Il1f6         | interleukin 1 family, member 6 [ (house mouse)]                                                                  |
| 17517105      | Il18          | interleukin 18 [ (house mouse)]                                                                                  |
| 17512868      | Chst4         | carbohydrate (chondroitin 6/keratan) sulfotransferase 4 [ Mus musculus (house mouse) ]                           |
| 17499723      | LOC100505096  | alpha-defensin 20-like mRNA [ Mus musculus ]                                                                     |
| 17349304      | Tslp          | thymic stromal lymphopoietin [ (house mouse)]                                                                    |
| 17544740      | Kir3dl2       | killer cell immunoglobulin-like receptor, three domains, long cytoplasmic tail, 2 [ Mus musculus (house mouse) ] |
| 17344750      | H2-M9         | histocompatibility 2, M region locus 9 [ (house mouse)]                                                          |
| 17459294      | Igkv1-133     | immunoglobulin kappa variable 1-133 [ Mus musculus (house mouse) ]                                               |
| 17467534      | Igkv6-23      | immunoglobulin kappa variable 6-23 [ (house mouse)]                                                              |
| 17348400      | Gata6         | GATA binding protein 6 [ (house mouse)]                                                                          |
| 17467516      | Igk-V28       | immunoglobulin kappa chain variable 28 (V28) [ (house mouse)]                                                    |
| 17284423      | Ighg          | immunoglobulin heavy chain complex [ (house mouse)]                                                              |
| 17284484      | Ighg          | immunoglobulin heavy chain complex [ (house mouse)]                                                              |
| 17481334      | Dub1          | ubiquitin specific peptidase 17-like A [ (house mouse)]                                                          |
| 17471744      | Klra14        | killer cell lectin-like receptor subfamily A, member 14, pseudogene [ Mus musculus (house mouse) ]               |
| 17337152      | H2-Q10        | H2-Q10 histocompatibility 2, Q region locus 10 [ (house mouse)]                                                  |
| 17344126      | Hspa1b        | heat shock protein 1B [ (house mouse)]                                                                           |
| 17408123      | Cd160         | CD160 antigen [ Mus musculus (house mouse) ]                                                                     |
| 17307963      | Ebf2          | early B cell factor 2 [ (house mouse)]                                                                           |
| 17404230      | Gm5150        | predicted gene 5150 [ (house mouse)]                                                                             |
| 17472129      | Gucy2c        | guanylate cyclase 2c [ (house mouse)]                                                                            |
| 17284585      | V165-D-J-C mu | IgM variable region [ Mus musculus (house mouse) ]                                                               |
| 17341303      | Fpr-rs6       | formyl peptide receptor, related sequence 6 [ Mus musculus (house mouse) ]                                       |
| 17219164      | Sh2d1b2       | SH2 domain containing 1B2 [ (house mouse)]                                                                       |
| 17458377      | Gimap1        | GTPase, IMAP family member 1 [ Mus musculus (house mouse) ]                                                      |
| 17306991      | Gzmd          | granzyme D [ (house mouse)]                                                                                      |

| Transcript ID         | Gene Symbol   | Gene Name                                                                                                     |
|-----------------------|---------------|---------------------------------------------------------------------------------------------------------------|
| 17388681              | Rag2          | recombination activating gene 2 [ Mus musculus (house mouse) ]                                                |
| 17315178              | Nr4a1         | nuclear receptor subfamily 4, group A, member 1 [ Mus musculus (house mouse) ]                                |
| 17459423              | Igkv4-53      | immunoglobulin kappa variable 4-53 [ Mus musculus (house mouse) ]                                             |
| 17342770              | Spdef         | SAM pointed domain containing ets transcription factor [ Mus musculus (house mouse) ]                         |
| 17450501              | Gbp10         | guanylate-binding protein 10 [ (house mouse)]                                                                 |
| Fatty acid metabolism |               |                                                                                                               |
| 17482290              | Acsm4         | acyl-CoA synthetase medium-chain family member 4 [ Mus musculus (house mouse) ]                               |
| 17359918              | Elovl3        | elongation of very long chain fatty acids (FEN1/Elo2, SUR4/Elo3, yeast)-like 3 [ Mus musculus (house mouse) ] |
| 17536538              | Awat1         | acyl-CoA wax alcohol acyltransferase 1 [ Mus musculus (house mouse) ]                                         |
| 17333292              | Slc22a2       | solute carrier family 22 (organic cation transporter), member 2 [ Mus musculus (house mouse) ]                |
| 17529307              | Elovl4        | elongation of very long chain fatty acids (FEN1/Elo2, SUR4/Elo3, yeast)-like 4 [ Mus musculus (house mouse) ] |
| 17482230              | Acsm5         | acyl-CoA synthetase medium-chain family member 5 [ Mus musculus (house mouse) ]                               |
| 17482310              | Acsm3         | acyl-CoA synthetase medium-chain family member 3 [ Mus musculus (house mouse) ]                               |
| Tumor-associated      |               |                                                                                                               |
| 17317428              | Gsdmc         | gasdermin C [ (house mouse)]                                                                                  |
| 17318008              | 2300005B03Rik | secreted Ly6/Plaur domain containing 2 [ Mus musculus (house mouse) ]                                         |
| 17543139              | Mageb1        | melanoma antigen, family B, 1 [ (house mouse)]                                                                |
| 17345797              | Apobec2       | apolipoprotein B mRNA editing enzyme, catalytic polypeptide 2 [ Mus musculus (house mouse) ]                  |
| 17477184              | Klk14         | kallikrein related-peptidase 14 [ (house mouse)]                                                              |
| Neurotransduction     |               |                                                                                                               |
| 17481252              | Olfr635       | olfactory receptor 635 [ Mus musculus (house mouse) ]                                                         |
| 17387638              | Olfr1042      | olfactory receptor 1042 [ Mus musculus (house mouse) ]                                                        |
| 17494154              | Olfr578       | olfactory receptor 578 [ Mus musculus (house mouse) ]                                                         |
| 17387758              | Olfr1128      | olfactory receptor 1128 [ Mus musculus (house mouse) ]                                                        |
| 17429290              | Olfr1328      | olfactory receptor 1328 [ Mus musculus (house mouse) ]                                                        |

| <b>Transcript ID</b> | <b>Gene Symbol</b> | <b>Gene Name</b>                                                                            |
|----------------------|--------------------|---------------------------------------------------------------------------------------------|
| 17387612             | Olfr1002           | olfactory receptor 1002 [ Mus musculus (house mouse) ]                                      |
| 17448997             | Nmu                | neuromedin U [ Mus musculus (house mouse) ]                                                 |
| 17494422             | Olfr655            | olfactory receptor 655 [ Mus musculus (house mouse) ]                                       |
| 17481359             | Olfr689            | olfactory receptor 689 [ Mus musculus (house mouse) ]                                       |
| 17246435             | Olfr810            | olfactory receptor 810 [ Mus musculus (house mouse) ]                                       |
| 17494457             | Olfr675            | olfactory receptor 675 [ Mus musculus (house mouse) ]                                       |
| 17494170             | Olfr603            | olfactory receptor 603 [ Mus musculus (house mouse) ]                                       |
| 17337618             | Olfr128            | olfactory receptor 128 [ Mus musculus (house mouse) ]                                       |
| 17337580             | Olfr111            | olfactory receptor 111 [ Mus musculus (house mouse) ]                                       |
| 17516145             | Olfr894            | olfactory receptor 894 [ Mus musculus (house mouse) ]                                       |
| 17494267             | Olfr640            | olfactory receptor 640 [ Mus musculus (house mouse) ]                                       |
| 17494115             | Olfr553            | olfactory receptor 553 [ Mus musculus (house mouse) ]                                       |
| 17494144             | Olfr569            | olfactory receptor 569 [ Mus musculus (house mouse) ]                                       |
| 17494214             | Olfr68             | olfactory receptor 68 [ Mus musculus (house mouse) ]                                        |
| 17516120             | Olfr145            | olfactory receptor 145 [ Mus musculus (house mouse) ]                                       |
| 17481182             | Olfr594            | olfactory receptor 594 [ Mus musculus (house mouse) ]                                       |
| 17540378             | Maob               | monoamine oxidase B [ (house mouse)]                                                        |
| 17525712             | Olfr937            | olfactory receptor 937 [ Mus musculus (house mouse) ]                                       |
| 17481155             | Olfr568            | olfactory receptor 568 [ Mus musculus (house mouse) ]                                       |
| 17516143             | Olfr893            | olfactory receptor 893 [ Mus musculus (house mouse) ]                                       |
| 17265818             | Olfr410            | olfactory receptor 410 [ Mus musculus (house mouse) ]                                       |
| 17387810             | Olfr1166           | olfactory receptor 1166 [ Mus musculus (house mouse) ]                                      |
| 17372888             | Olfr1151           | olfactory receptor 1151 [ Mus musculus (house mouse) ]                                      |
| 17333812             | Vmn2r101           | vomer nasal 2, receptor 101 [ Mus musculus (house mouse) ]                                  |
| 17370345             | Olfr348            | olfactory receptor 348 [ Mus musculus (house mouse) ]                                       |
| 17264946             | Chrn1              | cholinergic receptor, nicotinic, beta polypeptide 1 (muscle) [ Mus musculus (house mouse) ] |
| 17337614             | Olfr127            | olfactory receptor 127 [ Mus musculus (house mouse) ]                                       |
| 17372351             | Neurod1            | neurogenic differentiation 1 [ (house mouse)]                                               |
| 17486216             | Vmn2r32            | vomer nasal 2, receptor 32 [ Mus musculus ]                                                 |



| Transcript ID | Gene Symbol | Gene Name                                                |
|---------------|-------------|----------------------------------------------------------|
| 17274408      | Gm17758     | predicted gene, 17758 [ Mus musculus (house mouse) ]     |
| 17458950      | Vmn1r13     | vomeronasal 1 receptor 13 [ Mus musculus (house mouse) ] |
| 17248973      | Olfr1387    | olfactory receptor 1387 [ Mus musculus (house mouse) ]   |
| 17486261      | Vmn2r41     | Vmn2r4vomeronasal 2, receptor 41 [ (house mouse)]1       |
| 17238667      | Olfr787     | olfactory receptor 787 [ Mus musculus (house mouse) ]    |
| 17238661      | Olfr782     | olfactory receptor 782 [ Mus musculus (house mouse) ]    |
| 17372781      | Olfr1029    | olfactory receptor 1029 [ Mus musculus (house mouse) ]   |
| 17481194      | Olfr598     | olfactory receptor 598 [ Mus musculus (house mouse) ]    |
| 17516120      | Olfr145     | olfactory receptor 145 [ Mus musculus (house mouse) ]    |
| 17494447      | Olfr668     | olfactory receptor 668 [ Mus musculus (house mouse) ]    |
| 17481141      | Olfr557     | olfactory receptor 557 [ Mus musculus (house mouse) ]    |
| 17387810      | Olfr1166    | olfactory receptor 1166 [ Mus musculus (house mouse) ]   |
| 17494319      | Olfr649     | olfactory receptor 649 [ Mus musculus (house mouse) ]    |
| 17238689      | Olfr808     | olfactory receptor 808 [ Mus musculus (house mouse) ]    |
| 17486646      | Vmn1r86     | vomeronasal 1 receptor 62 [ (house mouse)]               |
| 17417819      | Olfr1339    | olfactory receptor 1339 [ Mus musculus (house mouse) ]   |
| 17516274      | Olfr961     | olfactory receptor 961 [ Mus musculus (house mouse) ]    |
| 17305937      | Olfr726     | olfactory receptor 726 [ Mus musculus (house mouse) ]    |
| 17372771      | Olfr1022    | olfactory receptor 1022 [ Mus musculus (house mouse) ]   |
| 17502366      | Olfr372     | olfactory receptor 372 [ Mus musculus (house mouse) ]    |
| 17516147      | Olfr143     | olfactory receptor 143 [ Mus musculus (house mouse) ]    |
| 17459005      | Vmn1r28     | vomeronasal 1 receptor 28 [ Mus musculus (house mouse) ] |
| 17481215      | Olfr617     | olfactory receptor 617 [ Mus musculus (house mouse) ]    |
| 17531799      | Mir128-2    | microRNA 128-2 [ (house mouse)]                          |
| 17481196      | Olfr599     | olfactory receptor 599 [ Mus musculus (house mouse) ]    |
| 17481171      | Olfr584     | olfactory receptor 584 [ Mus musculus (house mouse) ]    |
| 17525710      | Olfr936     | olfactory receptor 936 [ Mus musculus (house mouse) ]    |
| 17248973      | Olfr1387    | olfactory receptor 1387 [ Mus musculus (house mouse) ]   |
| 17368200      | Gm13539     | predicted gene 13539 [ (house mouse)]                    |

| Transcript ID           | Gene Symbol   | Gene Name                                                                               |
|-------------------------|---------------|-----------------------------------------------------------------------------------------|
| 17387886                | Olfr1218      | olfactory receptor 1218 [ Mus musculus (house mouse) ]                                  |
| 17333776                | Vmn2r96       | vomeronasal 2, receptor 96 [ Mus musculus (house mouse) ]                               |
| 17458950                | Vmn1r13       | vomeronasal 1 receptor 13 [ (house mouse)]                                              |
| 17238671                | Olfr790       | olfactory receptor 790 [ Mus musculus (house mouse) ]                                   |
| 17387723                | Olfr1099      | olfactory receptor 1099 [ Mus musculus (house mouse) ]                                  |
| 17524336                | Olfr850       | olfactory receptor 850 [ Mus musculus (house mouse) ]                                   |
| oxidation and reduction |               |                                                                                         |
| 17285631                | Gpx6          | glutathione peroxidase 6 [ Mus musculus (house mouse) ]                                 |
| 17273240                | Pycr1         | pyrroline-5-carboxylate reductase 1 [ Mus musculus (house mouse) ]                      |
| Cell death              |               |                                                                                         |
| 17513135                | Ldhd          | lactate dehydrogenase D [ Mus musculus (house mouse) ]                                  |
| 17265526                | Nlrp1c        | NLR family, pyrin domain containing 1C                                                  |
| 17494431                | Dub3          | ubiquitin specific peptidase 17-like E [ Mus musculus (house mouse) ]                   |
| 17292327                | Mirlet7f-1    | microRNA let7f-1 [ (house mouse)]                                                       |
| 17322507                | Dnase1        | deoxyribonuclease I [ (house mouse)]                                                    |
| 17295569                | Naip2         | NLR family, apoptosis inhibitory protein 2 [ (house mouse)]                             |
| 17237280                | Phlda1        | pleckstrin homology like domain, family A, member 1 [ Mus musculus (house mouse) ]      |
| Xenobiotic excretion    |               |                                                                                         |
| 17229050                | Fmo6          | flavin containing monooxygenase 6 [ Mus musculus (house mouse) ]                        |
| Others                  |               |                                                                                         |
| 17423019                | Sdr16c6       | short chain dehydrogenase/reductase family 16C, member 6 [ Mus musculus (house mouse) ] |
| 17326933                | Krtap6-3      | keratin associated protein 6-3 [ Mus musculus (house mouse) ]                           |
| 17376191                | Tgm3          | transglutaminase 3, E polypeptide [ Mus musculus (house mouse) ]                        |
| 17322026                | Krt2          | keratin 2 [ (house mouse)]                                                              |
| 17211347                | Tfap2b        | transcription factor AP-2 beta [ Mus musculus (house mouse) ]                           |
| 17329207                | 2310042E22Rik | transmembrane epididymal family member 3 [ Mus musculus (house mouse) ]                 |
| 17507665                | AF366264      | cDNA sequence AF366264 [ (house mouse)]                                                 |
| 17212301                | Tmem182       | transmembrane protein 182 [ (house mouse)]                                              |

| Transcript ID | Gene Symbol   | Gene Name                                                                                   |
|---------------|---------------|---------------------------------------------------------------------------------------------|
| 17539494      | Ace2          | angiotensin I converting enzyme (peptidyl-dipeptidase A) 2 [ Mus musculus (house mouse) ]   |
| 17379992      | Sall4         | sal-like 4 (Drosophila) [ (house mouse)]                                                    |
| 17382592      | Ptgds         | prostaglandin D2 synthase (brain) [ (house mouse)]                                          |
| 17366922      | Mir669m-1     | microRNA 669m-1 [ Mus musculus (house mouse) ]                                              |
| 17407431      | Lce1a1        | late cornified envelope 1A1 [ Mus musculus (house mouse) ]                                  |
| 17274021      | Osr1          | odd-skipped related 1 (Drosophila) [ Mus musculus (house mouse) ]                           |
| 17477266      | Klk5          | kallikrein related-peptidase 5 [ (house mouse)]                                             |
| 17399981      | Rptn          | repetin [ (house mouse)]                                                                    |
| 17407439      | Lce1a2        | late cornified envelope 1A2 [ Mus musculus (house mouse) ]                                  |
| 17277760      | 5430427M07Rik | RIKEN cDNA 5430427M07 gene [ Mus musculus (house mouse) ]                                   |
| 17304901      | 3425401B19Rik | RIKEN cDNA 3425401B19 gene [ Mus musculus (house mouse) ]                                   |
| 17322099      | Krt78         | keratin 78 [ (house mouse)]                                                                 |
| 17291222      | Hist2h3b      | histone cluster 2, H3b [ (house mouse)]                                                     |
| 17444481      | Bhlha15       | basic helix-loop-helix family, member a15 [ Mus musculus (house mouse) ]                    |
| 17330649      | Gm17783       | predicted gene, 17783 [ Mus musculus ]                                                      |
| 17483383      | Snora30       | small nucleolar RNA, H/ACA box 30                                                           |
| 17214899      | Gm7609        | predicted pseudogene 7609 [ (house mouse)]                                                  |
| 17449372      | Ugt2b38       | UDP glucuronosyltransferase 2 family, polypeptide B38 [ Mus musculus (house mouse) ]        |
| 17455210      | Gm5565        | predicted gene 5565 [ Mus musculus ]                                                        |
| 17232731      | Rnu3a         | U3A small nuclear RNA [ Mus musculus ]                                                      |
| 17324398      | Snora81       | small nucleolar RNA, H/ACA box 81                                                           |
| 17234423      | Der13         | Der1-like domain family, member 3 [ (house mouse)]                                          |
| 17340397      | Nanp          | N-acetylneuraminic acid phosphatase [ Mus musculus (house mouse) ]                          |
| 17494221      | Hbb-b1        | hemoglobin, beta adult major chain [ (house mouse)]                                         |
| 17536044      | Gm5938        | predicted gene 5938 [ Mus musculus (house mouse) ]                                          |
| 17476604      | Abpe          | secretoglobin, family 2B, member 2 [ Mus musculus (house mouse) ]                           |
| 17278328      | Serpina3n     | serine (or cysteine) peptidase inhibitor, clade A, member 3N [ Mus musculus (house mouse) ] |
| 17507665      | AF366264      | cDNA sequence AF366264 [ (house mouse)]                                                     |

| Transcript ID | Gene Symbol   | Gene Name                                                                                |
|---------------|---------------|------------------------------------------------------------------------------------------|
| 17288302      | Rsl1          | regulator of sex limited protein 1 [ (house mouse)]                                      |
| 17535269      | 1700020N15Rik | 1700020N15Rik RIKEN cDNA 1700020N15 gene [ (house mouse)]                                |
| 17232176      | Taar2         | trace amine-associated receptor 2 [ (house mouse)]                                       |
| 17290195      | LOC639910     | mouse hypothetical protein LOC639910                                                     |
| 17234363      | 4933407G14Rik | RIKEN cDNA 4933407G14 gene [ (house mouse)]                                              |
| 17435170      | 6030443J06Rik | RIKEN cDNA 6030443J06 gene [ (house mouse)]                                              |
| 17389132      | Gm13939       | pluripotency associated transcript 8 [ Mus musculus (house mouse) ]                      |
| 17503926      | Mt4           | metallothionein 4 [ (house mouse)]                                                       |
| 17294034      | Zfp71-rs1     | zinc finger protein 71, related sequence 1 [Mus musculus]                                |
| 17474278      | Ceacam5       | carcinoembryonic antigen-related cell adhesion molecule 5 [ Mus musculus (house mouse) ] |
| 17239769      | Taar9         | trace amine-associated receptor 9 [ (house mouse)]                                       |
| 17308759      | 4930444M15Rik | RIKEN cDNA 4930444M15 gene [ (house mouse)]                                              |
| 17381626      | 8030442B05Rik | RIKEN cDNA 8030442B05 gene [ Mus musculus (house mouse) ]                                |
| 17277659      | BB287469      | expressed sequence BB287469 [ (house mouse)]                                             |
| 17378238      | 1700007I08Rik | actin-like 10 [ Mus musculus (house mouse) ]                                             |
| 17241729      | Phyhipl       | phytanoyl-CoA hydroxylase interacting protein-like [ Mus musculus (house mouse) ]        |
| 17278713      | Rtl1          | retrotransposon-like 1 [ (house mouse)]                                                  |
| 17421103      | B330016D10Rik | RIKEN cDNA B330016D10 gene [ Mus musculus (house mouse) ]                                |
| 17324125      | Polr2h        | polymerase (RNA) II (DNA directed) polypeptide H [ Mus musculus (house mouse) ]          |
| 17432521      | C87977        | expressed sequence C87977 [ (house mouse)]                                               |
| 17324475      | A230028O05Rik | RIKEN cDNA A230028O05 gene [ Mus musculus (house mouse) ]                                |
| 17474361      | Sycp1-ps1     | synaptonemal complex protein 1, pseudogene 1 [ Mus musculus (house mouse) ]              |
| 17280254      | Gm5433        | predicted gene 5433 [ (house mouse)]                                                     |
| 17293982      | Zfp874b       | zinc finger protein 874b [ Mus musculus (house mouse) ]                                  |
| 17381190      | Gm14496       | predicted gene 14496 [ (house mouse)]                                                    |
| 17366810      | Mir669a-1     | microRNA 669a-1 [ (house mouse)]                                                         |
| 17366846      | Mir669a-1     | microRNA 669a-1 [ (house mouse)]                                                         |

| <b>Transcript ID</b> | <b>Gene Symbol</b> | <b>Gene Name</b>                                                                                 |
|----------------------|--------------------|--------------------------------------------------------------------------------------------------|
| 17406323             | MNE1               | meiotic nuclear divisions 1 [ (house mouse)]                                                     |
| 17225113             | Gm19524            | predicted gene 19524 [ (house mouse)]                                                            |
| 17289009             | Hapln1             | hyaluronan and proteoglycan link protein 1 [ Mus musculus (house mouse) ]                        |
| 17296565             | Gm2888             | predicted gene 2888 [ (house mouse)]                                                             |
| 17494221             | Hbb-b1             | hemoglobin, beta adult major chain [ (house mouse)]                                              |
| 17505877             | Clec3a             | C-type lectin domain family 3, member a [ (house mouse)]                                         |
| 17399858             | Sprr2a2            | small proline-rich protein 2A2 [ (house mouse)]                                                  |
| 17337679             | Gm17495            | exocrine gland secreted peptide 8 [ Mus musculus (house mouse) ]                                 |
| 17427928             | Dio1               | deiodinase, iodothyronine, type I [ (house mouse)]                                               |
| 17329316             | Dgkg               | diacylglycerol kinase, gamma [ (house mouse)]                                                    |
| 17234363             | 4933407G14Rik      | RIKEN cDNA 4933407G14 gene [ Mus musculus (house mouse) ]                                        |
| 17340397             | Nanp               | N-acetylneuraminic acid phosphatase [ Mus musculus (house mouse) ]                               |
| 17457737             | Try10              | trypsin 10 [ (house mouse)]                                                                      |
| 17536052             | Obp1b              | odorant binding protein 1B [ Mus musculus (house mouse) ]                                        |
| 17216127             | Gm7889             | predicted gene 7889 [ Mus musculus (house mouse) ]                                               |
| 17289016             | Gm4117             | predicted gene 4117 [ Mus musculus (house mouse) ]                                               |
| 17540743             | Slx                | Sycp3 like X-linked [ Mus musculus (house mouse) ]                                               |
| 17274405             | Gm19924            | predicted gene 19924 [ Mus musculus (house mouse) ]                                              |
| 17544870             | Ripply1            | rippy transcriptional repressor 1 [ Mus musculus (house mouse) ]                                 |
| 17424968             | Gm12409            | predicted gene 12409 [ Mus musculus (house mouse) ]                                              |
| 17217237             | Gm10538            | predicted gene 10538 [ Mus musculus (house mouse) ]                                              |
| 17341905             | Rab26              | RAB26, member RAS oncogene family [ Mus musculus (house mouse) ]                                 |
| 17472023             | Mansc1             | MANSC domain containing 1 [ Mus musculus (house mouse) ]                                         |
| 17325933             | Gm6030             | predicted gene 6030 [ Mus musculus (house mouse) ]                                               |
| 17502603             | Rasd2              | RASD family, member 2 [ (house mouse)]                                                           |
| 17448595             | Gabra4             | gamma-aminobutyric acid (GABA) A receptor, subunit alpha 4 [ Mus musculus (house mouse) ]        |
| 17424822             | Gne                | glucosamine (UDP-N-acetyl)-2-epimerase/N-acetylmannosamine kinase [ Mus musculus (house mouse) ] |
| 17233507             | BB019430           | expressed sequence BB019430 [ Mus musculus (house mouse) ]                                       |

| <b>Transcript ID</b> | <b>Gene Symbol</b> | <b>Gene Name</b>                                                                               |
|----------------------|--------------------|------------------------------------------------------------------------------------------------|
| 17523201             | Myrip              | myosin VIIA and Rab interacting protein [ <i>Mus musculus</i> (house mouse) ]                  |
| 17314679             | Tuba1b             | tubulin, alpha 1B [ <i>Mus musculus</i> (house mouse) ]                                        |
| 17535045             | Gm14718            | predicted gene 14718 [ <i>Mus musculus</i> (house mouse) ]                                     |
| 17464943             | Ppp1r3a            | protein phosphatase 1, regulatory (inhibitor) subunit 3A [ <i>Mus musculus</i> (house mouse) ] |
| 17371296             | Xirp2              | xin actin-binding repeat containing 2 [ <i>Mus musculus</i> (house mouse) ]                    |
| 17232453             | Trdn               | triadin [ <i>Mus musculus</i> (house mouse) ]                                                  |
