# Supplementary material for: Nanoemulsion adjuvantation strategy of tumor-associated antigen therapy rephrases mucosal and immunotherapeutic signatures following intranasal vaccination
Source: PubMed Central journal article supplement — J Immunother Cancer. 2020 Oct 9;8(2):e001022. doi: 10.1136/jitc-2020-001022 (PMC7549439; doi:10.1136/jitc-2020-001022), 2020-10-09
Supplement: jitc-2020-001022supp002.pdf [file jitc-2020-001022supp002.pdf]

## Graphical Abstract

### Nanoemulsion adjuvantation strategy of tumor-associated antigen therapy rephrases mucosal and immunotherapeutic signatures following intranasal vaccination

Chung-Hsiung Huang, Chiung-Yi Huang, Hui-Min Ho, Ching-Hung Lee, Pang-Ti Lai, Suh-Chin Wu, Shih-Jen Liu, Ming-Hsi Huang

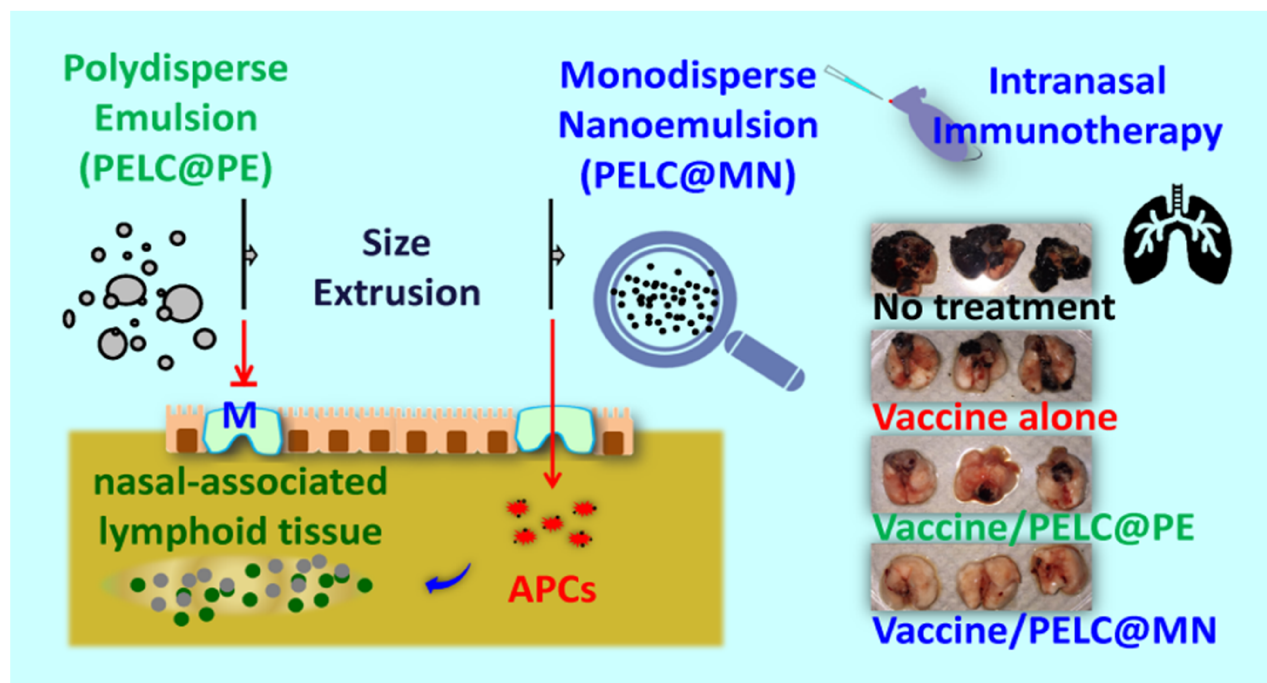

Nanoemulsion adjuvantation can facilitate the transportation of antigen across mucosal membrane to the nasal-associated lymphoid tissue, thereby rephrasing the immunotherapeutic signatures and improving the efficacy of tumor-associated antigen therapy against in situ and metastatic tumors.
